# Supplementary material
Source: PubMed Central journal article supplement (PMC1201578)
Supplement: pnas_0502950102_1.pdf [file pnas_0502950102_1.pdf]

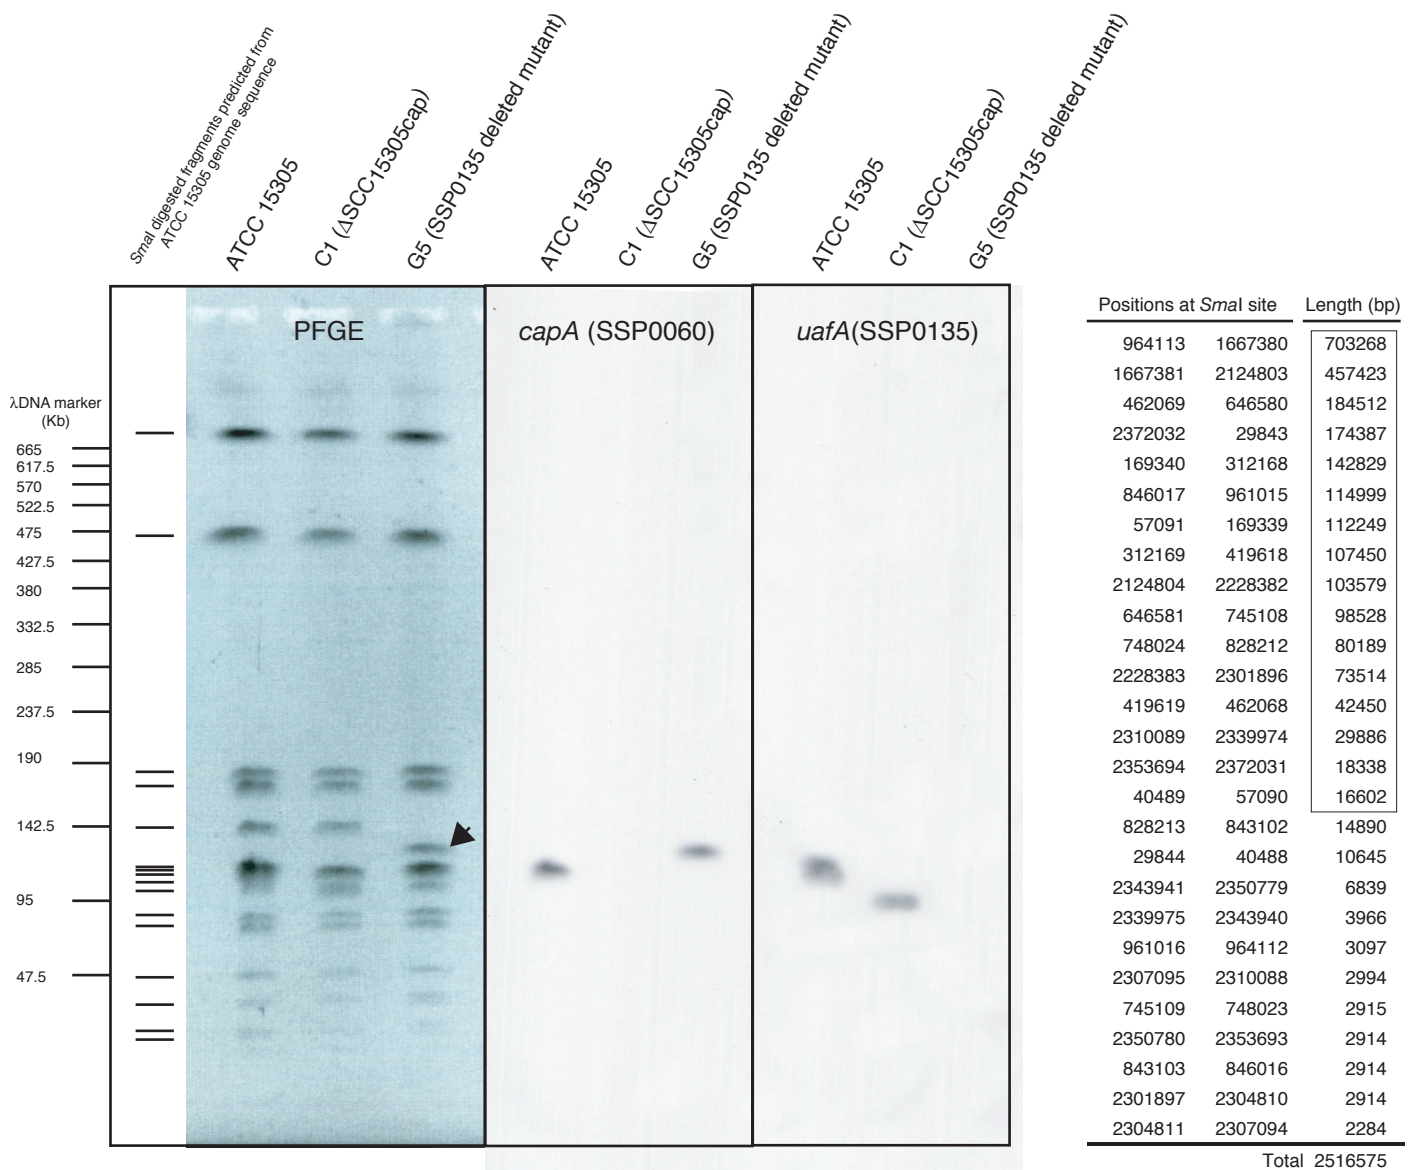

**Fig. 6.** Pulsed-field gel electrophoresis (PFGE) analysis was performed to verify the genome sequence of ATCC 15305. Predicted *Smal*-digested fragments are consistent with a obtained PFGE profile of ATCC 15305. C1 ( $\Delta$ SCC<sub>15305cap</sub>) and G5 (*uafA* deleted mutant) are confirmed as isogenic derivatives from ATCC 15305. The excised junction of  $\Delta$ SCC<sub>15305cap</sub> in C1 strain can be amplified by PCR, and definitely consistent with the consensus sequence of the attachment site for Ccr recombinases (the duplicated both *att* sequences are 5'-GAAGCGTATCACAAATAA-3'; the consensus sequence is referred to the report in ref. 1). Southern hybridization also shows no band with the *capA* gene specific probe in C1. Arrow indicates the DNA fragment in G5 including a deleted region, and Southern hybridization shows no band with the *uafA* gene specific probe in G5. PFGE analysis was done at the condition as follows: 6V/cm,  $\pm 60^\circ$  angle, 5.3 sec initial time, 50 sec final time, running for 20 h with 0.5x TBE by Bio-Rad CHEF MAPPER.

1. Ito, T., Ma, X. X., Takeuchi, F., Okuma, K., Yuzawa, H. & Hiramatsu, K. (2004) *Antimicrob. Agents Chemother.* **48**, 2637-2651.
