# Supplementary material
Source: PubMed Central journal article supplement (PMC1201578)
Supplement: pnas_0502950102_2.pdf [file pnas_0502950102_2.pdf]

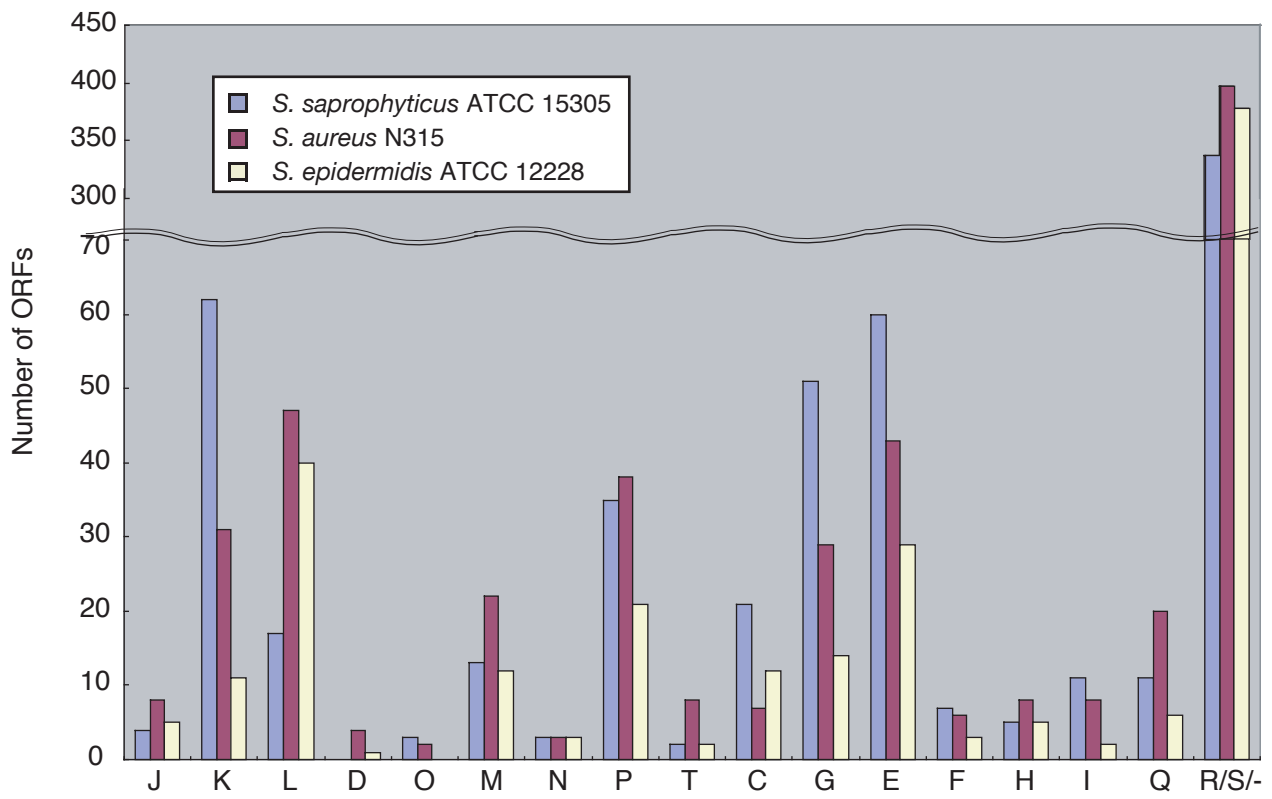

**Fig. 7.** Classification of species-specific ORFs based on the clusters of orthologous groups (COGs) category.
