# Supplementary material
Source: PubMed Central journal article supplement (PMC1201578)
Supplement: pnas_0502950102_4.pdf [file pnas_0502950102_4.pdf]

**Table 2.** Comparison of general features of the whole genome sequenced staphylococci

| Chromosome                                | <i>Staphylococcus saprophyticus</i> | <i>Staphylococcus aureus</i> |         |         |         |         |         |           | <i>Staphylococcus epidermidis</i> |  |
|-------------------------------------------|-------------------------------------|------------------------------|---------|---------|---------|---------|---------|-----------|-----------------------------------|--|
|                                           | ATCC15305                           | N315                         | Mu50    | MW2     | COL     | MRSA252 | MSSA476 | ATCC12228 | RP62A                             |  |
| Length bp                                 | 2516575                             | 2814816                      | 2878529 | 2820462 | 2809422 | 2902619 | 2799802 | 2499279   | 2616530                           |  |
| G+C content of genome                     | 33.2                                | 32.8                         | 32.9    | 32.8    | 32.8    | 32.8    | 32.9    | 32.1      | 32.2                              |  |
| Coding region:Total                       | 2106915                             | 2352201                      | 2412507 | 2359938 | 2323101 | 2373315 | 2294757 | 2093049   | 2162487                           |  |
| Coding region:G+C                         | 716681                              | 789291                       | 809980  | 790482  | 778482  | 795828  | 769376  | 689856    | 712223                            |  |
| G+C content of the protein coding regions | 34.0                                | 33.6                         | 33.6    | 33.5    | 33.5    | 33.5    | 33.5    | 33.0      | 32.9                              |  |
| Number of ORFs assigned                   | 2446                                | 2593                         | 2699    | 2632    | 2615    | 2656    | 2579    | 2419      | 2494                              |  |
| Average ORF size                          | 861.4                               | 907.1                        | 893.9   | 896.6   | 888.4   | 893.6   | 889.8   | 865.3     | 867.1                             |  |
| Percentage of the coding regions          | 83.7                                | 83.6                         | 83.8    | 83.7    | 82.7    | 81.8    | 82.0    | 83.7      | 82.6                              |  |
| non-coding:Total                          | 377451                              | 434829                       | 438501  | 428387  | 454190  | 496763  | 467917  | 378968    | 420612                            |  |
| non-coding:G+C                            | 103202                              | 120834                       | 122224  | 118926  | 127044  | 140377  | 132004  | 98095     | 111803                            |  |
| G+C content of the non-coding regions     | 27.3                                | 27.8                         | 27.9    | 27.8    | 28.0    | 28.3    | 28.2    | 25.9      | 26.6                              |  |
| rRNA:Total                                | 27199                               | 22635                        | 22635   | 27139   | 27673   | 23082   | 27673   | 22619     | 27661                             |  |
| rRNA:G+C                                  | 13786                               | 11440                        | 11440   | 13719   | 13942   | 11634   | 13946   | 11534     | 14074                             |  |
| G+C content of the rRNA coding regions    | 50.7                                | 50.5                         | 50.5    | 50.6    | 50.4    | 50.4    | 50.4    | 51.0      | 50.9                              |  |
| tRNA:Total                                | 4649                                | 4792                         | 4527    | 4639    | 4099    | 4639    | 4636    | 4643      | 4736                              |  |
| tRNA:G+C                                  | 2666                                | 2758                         | 2592    | 2660    | 2357    | 2660    | 2655    | 2663      | 2706                              |  |
| G+C content of the tRNA coding regions    | 57.3                                | 57.6                         | 57.3    | 57.3    | 57.5    | 57.3    | 57.3    | 57.4      | 57.1                              |  |
| tmRNA:Total                               | 361                                 | 359                          | 359     | 359     | 359     | 359     | 359     |           | 359                               |  |
| tmRNA:G+C                                 | 171                                 | 161                          | 161     | 159     | 158     | 159     | 159     |           | 160                               |  |
| G+C content of the tmRNA coding regions   | 47.4                                | 44.8                         | 44.8    | 44.3    | 44.0    | 44.3    | 44.3    |           | 44.6                              |  |
| Number of 5SrRNA                          | 8                                   | 6                            | 6       | 7       | 7       | 4       | 7       | 6         | 7                                 |  |
| Number of 16SrRNA                         | 6                                   | 5                            | 5       | 6       | 6       | 5       | 6       | 5         | 6                                 |  |
| Number of 23SrRNA                         | 6                                   | 5                            | 5       | 6       | 6       | 5       | 6       | 5         | 6                                 |  |
| Number of tRNA                            | 60                                  | 62                           | 60      | 60      | 53      | 60      | 60      | 60        | 61                                |  |
| Number of tmRNA                           | 1                                   | 1                            | 1       | 1       | 1       | 1       | 1       | 0         | 1                                 |  |
| Number of unknownRNA                      | 0                                   | 0                            | 0       | 0       | 0       | 24      | 24      | 0         | 2                                 |  |

| Plasmid                                   | <i>Staphylococcus saprophyticus</i><br>pSSP1 |
|-------------------------------------------|----------------------------------------------|
| Length bp                                 | 38454                                        |
| G+C content of genome                     | 30.8                                         |
| Coding region:Total                       | 31569                                        |
| Coding region:G+C                         | 9972                                         |
| G+C content of the protein coding regions | 31.6                                         |
| Number of ORFs assigned                   | 45                                           |
| Average ORF size                          | 701.5                                        |
| Percentage of the coding regions          | 82.1                                         |
| non-coding:Total                          | 6885                                         |
| non-coding:G+C                            | 1854                                         |
| G+C content of the non-coding regions     | 26.9                                         |
|                                           | <i>Staphylococcus saprophyticus</i><br>pSSP2 |
| Length bp                                 | 22870                                        |
| G+C content of genome                     | 31.3                                         |
| Coding region:Total                       | 16704                                        |
| Coding region:G+C                         | 5427                                         |
| G+C content of the protein coding regions | 32.5                                         |
| Number of ORFs assigned                   | 23                                           |
| Average ORF size                          | 726.3                                        |
| Percentage of the coding regions          | 73.0                                         |
| non-coding:Total                          | 6166                                         |
| non-coding:G+C                            | 1741                                         |
| G+C content of the non-coding regions     | 28.2                                         |
