# Supplementary material
Source: PubMed Central journal article supplement (PMC1201578)
Supplement: pnas_0502950102_5.pdf [file pnas_0502950102_5.pdf]

**Table 3.** Non orthologous ORFs in *Staphylococcus saprophyticus* ATCC 15305

| ORF ID            | COG <sup>†</sup> | Product                                                                                                                    |
|-------------------|------------------|----------------------------------------------------------------------------------------------------------------------------|
| Transport systems |                  |                                                                                                                            |
| SSP0084           | C                | Putative L-lactate permease 2                                                                                              |
| SSP0230           | C                | L-lactate permease                                                                                                         |
| SSP0329           | C                | Na <sup>+</sup> /H <sup>+</sup> antiporter                                                                                 |
| SSP0560           | C                | Na <sup>+</sup> /H <sup>+</sup> antiporter                                                                                 |
| SSP0948           | C                | Putative proton/glutamate symporter                                                                                        |
| SSP0189           | E                | Putative cationic amino acid transporter                                                                                   |
| SSP0286           | E                | D-serine/D-alanine/glycine transporter                                                                                     |
| SSP0444           | E                | Putative amino acid transporter                                                                                            |
| SSP0451           | E                | ABC-type proline/glycine betaine transport system, ATPase component                                                        |
| SSP0454           | E                | ABC-type proline/glycine betaine transport system, permease component                                                      |
| SSP0507           | E                | Putative proton/sodium-glutamate symport protein, truncated                                                                |
| SSP0508*          | E                | Putative proton/sodium-glutamate symport protein                                                                           |
| SSP0618           | E                | ABC-type amino acid transport system, permease component                                                                   |
| SSP0619           | E                | Putative ABC-type amino acid transport system, permease component                                                          |
| SSP0620           | E                | Putative ABC-type amino acid transport system, periplasmic component                                                       |
| SSP0621           | E                | Putative ABC-type polar amino acid transport system, ATPase component                                                      |
| SSP0936           | E                | ABC-type amino acid transport system, periplasmic component, truncated                                                     |
| SSP1099           | E                | Proline/betaine transporter, partial                                                                                       |
| SSP1990           | E                | Putative di-tripeptide permease                                                                                            |
| SSP2171           | E                | Putative D-serine/D-alanine/glycine transporter                                                                            |
| SSP2173           | E                | Putative amino acid permease                                                                                               |
| SSP2428           | E                | Putative glycine betaine transporter, partial                                                                              |
| SSP2432           | E                | Putative amino acid transporter                                                                                            |
| SSP0399           | EHR              | High affinity proline permease                                                                                             |
| SSP0104           | G                | Lactose permease                                                                                                           |
| SSP0123           | G                | Phosphotransferase system (PTS) beta-glucoside-specific enzyme IIABC component, truncated                                  |
| SSP0124           | G                | Phosphotransferase system (PTS) beta-glucoside-specific enzyme IIABC component, truncated                                  |
| SSP0216           | G                | Putative gluconate transporter, truncated                                                                                  |
| SSP0217           | G                | Putative gluconate transporter, truncated                                                                                  |
| SSP0218           | G                | Putative gluconate transporter, truncated                                                                                  |
| SSP0233           | G                | Phosphotransferase system IIC component, glucose/maltose/N-acetylglucosamine-specific, truncated                           |
| SSP0240           | G                | Phosphotransferase system, cellobiose-specific component IIB                                                               |
| SSP0254           | G                | Putative sugar phosphate permease, truncated                                                                               |
| SSP0255           | G                | Putative sugar phosphate permease, truncated                                                                               |
| SSP1392           | G                | Ribose ABC transporter (ribose-binding protein) rbsB                                                                       |
| SSP1393           | G                | Ribose ABC transporter (permease) rbsC                                                                                     |
| SSP1394           | G                | Ribose transport ATP-binding protein rbsA                                                                                  |
| SSP2311           | G                | Putative sugar transporter                                                                                                 |
| SSP2189           | GE               | Putative gluconate transporter                                                                                             |
| SSP0020           | GEPR             | Putative permease of the major facilitator superfamily                                                                     |
| SSP0164           | GEPR             | Putative permease of the major facilitator superfamily                                                                     |
| SSP0166           | GEPR             | Putative permease of the major facilitator superfamily                                                                     |
| SSP0203           | GEPR             | Putative permease of the major facilitator superfamily                                                                     |
| SSP0211           | GEPR             | Putative proline/betaine transporter                                                                                       |
| SSP0231           | GEPR             | Putative permease of the major facilitator superfamily                                                                     |
| SSP2129           | GEPR             | Putative permease of the major facilitator superfamily                                                                     |
| SSP2167           | GEPR             | Putative permease of the major facilitator superfamily                                                                     |
| SSP2180           | GEPR             | Putative $\alpha$ -ketoglutarate permease                                                                                  |
| SSP2308           | GEPR             | Putative permease of the major facilitator superfamily                                                                     |
| SSP2391           | GEPR             | Putative permease of the major facilitator superfamily                                                                     |
| SSP1622           | GER              | Putative permease                                                                                                          |
| SSP0323           | M                | Glycine betaine transporter                                                                                                |
| SSP0950           | M                | Teichoic acid translocation permease protein                                                                               |
| SSP0993           | M                | Periplasmic glycine betaine/choline-binding (lipo)protein of an ABC-type transport system (osmoprotectant binding protein) |
| SSP1344           | M                | Putative osmoprotectant transporter                                                                                        |
| SSP2195           | M                | Putative teichoic acid translocation permease                                                                              |
| SSP0182           | P                | Ferrichrome ABC transporter                                                                                                |
| SSP0184           | P                | Putative transporter                                                                                                       |
| SSP0272           | P                | Putative ferrichrome-binding lipoprotein precursor                                                                         |
| SSP0298           | P                | Sulfate permease                                                                                                           |
| SSP0304           | P                | Putative di- and tricarboxylate transporter                                                                                |
| SSP0359           | P                | ABC-type cobalt transport system, permease component                                                                       |
| SSP0360           | P                | ABC-type cobalt transport system, ATPase component                                                                         |
| SSP0422           | P                | ABC-type cobalamin/Fe <sup>3+</sup> -siderophores transport system, periplasmic component                                  |
| SSP0529           | P                | ABC-type cobalamin/Fe <sup>3+</sup> -siderophores transport system, periplasmic component                                  |
| SSP0574           | P                | Putative sulfate permease                                                                                                  |
| SSP0304           | P                | Putative di- and tricarboxylate transporter                                                                                |
| SSP1368           | P                | ABC-type cobalamin/Fe <sup>3+</sup> -siderophores transport system, periplasmic component                                  |

|         |   |                                                                                       |
|---------|---|---------------------------------------------------------------------------------------|
| SSP1382 | P | Putative ABC-type cobalamin/Fe3+-siderophores transport system, periplasmic component |
| SSP1630 | P | Arsenic efflux pump protein, truncated                                                |
| SSP1631 | P | Arsenic efflux pump protein, truncated                                                |
| SSP1632 | P | Arsenic efflux pump protein, truncated                                                |
| SSP1886 | P | Putative efflux pump                                                                  |
| SSP2176 | P | Putative Mn2+/Fe2+ transporter                                                        |
| SSP2306 | P | Putative ABC transporter permease, partial                                            |
| SSP2342 | P | Putative membrane transporter of cations and cationic drugs, partial                  |
| SSP2343 | P | Putative membrane transporter of cations and cationic drugs, partial                  |
| SSP0385 | Q | ABC-type multidrug/protein/lipid transport system, ATPase component                   |
| SSP0386 | Q | ABC-type multidrug/protein/lipid transport system, ATPase component                   |
| SSP0858 | Q | ABC-type multidrug transport system, ATPase component, truncated                      |
| SSP1336 | Q | Putative ABC transporter, ATP-binding protein                                         |
| SSP0086 | R | Putative permease of the major facilitator superfamily, truncated                     |
| SSP0087 | R | Putative permease of the major facilitator superfamily, truncated                     |
| SSP0142 | R | Putative permease                                                                     |
| SSP0151 | R | Putative permease                                                                     |
| SSP0190 | R | Conserved hypothetical protein                                                        |
| SSP0206 | R | Putative permease of the major facilitator superfamily, truncated                     |
| SSP0207 | R | Putative permease of the major facilitator superfamily, truncated                     |
| SSP0248 | R | ABC-type uncharacterized transport system, periplasmic component                      |
| SSP0319 | R | Putative permease of the major facilitator superfamily, truncated                     |
| SSP0320 | R | Putative permease of the major facilitator superfamily, truncated                     |
| SSP0343 | R | Putative permease of the drug/metabolite transporter (DMT) superfamily, truncated     |
| SSP0363 | R | Putative permease of the major facilitator superfamily, truncated                     |
| SSP0364 | R | Putative permease of the major facilitator superfamily, truncated                     |
| SSP1137 | R | Putative ABC-type transport system, ATPase component, truncated                       |
| SSP1138 | R | Putative ABC-type transport system, ATPase component, truncated                       |
| SSP1328 | R | Transporter, LysE family                                                              |
| SSP1337 | R | Putative ABC transporter, permease protein                                            |

#### Regulation systems

|         |   |                                                              |
|---------|---|--------------------------------------------------------------|
| SSP0841 | - | AgrD                                                         |
| SSP1602 | E | Putative transporter                                         |
| SSP0617 | G | Putative regulatory protein                                  |
| SSP0019 | K | Putative transcriptional regulator                           |
| SSP0085 | K | Transcriptional regulator, partial                           |
| SSP0094 | K | Transcriptional regulator                                    |
| SSP0102 | K | Transcriptional regulator                                    |
| SSP0103 | K | Lactose operon transcription activator                       |
| SSP0112 | K | Putative transcriptional regulator                           |
| SSP0122 | K | Putative transcriptional regulator, truncated                |
| SSP0132 | K | Transcriptional regulator                                    |
| SSP0139 | K | Transcriptional regulator                                    |
| SSP0148 | K | Transcriptional regulator, truncated                         |
| SSP0167 | K | Transcriptional regulator                                    |
| SSP0183 | K | Putative transcriptional regulator                           |
| SSP0198 | K | Putative transcriptional regulator                           |
| SSP0227 | K | Putative transcriptional regulator                           |
| SSP0245 | K | Putative transcriptional antiterminator, partial             |
| SSP0256 | K | Putative transcriptional regulator                           |
| SSP0273 | K | Putative transcriptional regulator                           |
| SSP0314 | K | Putative regulatory protein                                  |
| SSP0361 | K | Putative transcriptional regulator                           |
| SSP0362 | K | Putative transcriptional regulator                           |
| SSP0381 | K | Putative transcription antiterminator, truncated             |
| SSP0382 | K | Putative $\beta$ -glucoside operon antiterminator, truncated |
| SSP0408 | K | Putative transcriptional regulator, truncated                |
| SSP0514 | K | Putative transcriptional regulator                           |
| SSP0593 | K | Putative transcriptional regulator                           |
| SSP0628 | K | Putative transcriptional regulator                           |
| SSP0636 | K | Putative transcriptional regulator                           |
| SSP0738 | K | Putative transcriptional regulator                           |
| SSP0813 | K | RNA polymerase sigma-B factor, truncated                     |
| SSP0850 | K | Transcriptional regulator                                    |
| SSP1327 | K | Predicted transcriptional regulator                          |
| SSP1329 | K | Transcriptional regulator, truncated                         |
| SSP1330 | K | Transcriptional regulator, truncated                         |
| SSP1396 | K | Putative transcriptional repressor of ribose operon          |
| SSP1471 | K | Putative transcriptional regulator                           |
| SSP1604 | K | Putative transcriptional regulator                           |

|         |    |                                                        |
|---------|----|--------------------------------------------------------|
| SSP1620 | K  | Putative transcriptional regulator                     |
| SSP1628 | K  | Transcriptional regulator, partial                     |
| SSP1745 | K  | Putative transcriptional regulator                     |
| SSP2130 | K  | Transcriptional regulator                              |
| SSP2153 | K  | Putative transcriptional regulator, sarA paralog       |
| SSP2166 | K  | Transcriptional regulator                              |
| SSP2184 | K  | Transcriptional regulator                              |
| SSP2309 | K  | Transcriptional regulator, truncated                   |
| SSP2310 | K  | Transcriptional regulator, truncated                   |
| SSP2332 | K  | Putative transcriptional regulator                     |
| SSP2355 | K  | Transcriptional regulator                              |
| SSP2359 | K  | Transcriptional regulator                              |
| SSP2385 | K  | Putative transcriptional regulator, truncated          |
| SSP2386 | K  | Putative transcriptional regulator, truncated          |
| SSP2430 | K  | Putative transcriptional regulator, partial            |
| SSP0186 | KE | Putative transcriptional regulator                     |
| SSP1621 | KE | Putative transcriptional regulator                     |
| SSP0523 | KG | Putative transcriptional regulator of sugar metabolism |
| SSP2181 | KG | Transcriptional regulator                              |
| SSP0179 | KT | Putative transcriptional regulator                     |
| SSP1945 | S  | Hypothetical protein                                   |
| SSP1946 | S  | Hypothetical protein                                   |

#### Mobile elements

|         |   |                                         |
|---------|---|-----------------------------------------|
| SSP1642 | - | Probable integrase (truncated), partial |
| SSP1944 | K | Putative prophage antirepressor         |
| SSP0030 | L | Putative replication protein RepA       |
| SSP0046 | L | Cassette chromosome recombinase C       |
| SSP0335 | L | Transposase                             |
| SSP0903 | L | Putative transposase, truncated         |
| SSP0989 | L | Transposase                             |
| SSP1423 | L | Transposase                             |
| SSP1431 | L | Transposase, partial                    |
| SSP1605 | L | Putative transposase                    |
| SSP1611 | L | Transposase (IS431)                     |
| SSP1947 | L | Integrase                               |
| SSP0580 | R | Putative transposase, truncated         |
| SSP0581 | R | Putative transposase, truncated         |
| SSP0901 | R | Putative transposase, truncated         |
| SSP0902 | R | Putative transposase, truncated         |
| SSP0990 | R | Putative transposase, truncated         |
| SSP0991 | R | Putative transposase, truncated         |
| SSP1606 | R | Putative transposase                    |
| SSP1940 | R | Putative primase                        |

#### Virulence factors and antibiotics resistance

|         |   |                                                  |
|---------|---|--------------------------------------------------|
| SSP0130 | - | Putative antibacterial peptide                   |
| SSP1597 | - | Putative antibacterial protein                   |
| SSP1598 | - | Putative antibacterial protein                   |
| SSP1924 | - | Putative aminoglycoside adenylyltransferase      |
| SSP2165 | - | Putative fibronectin-binding protein             |
| SSP0392 | E | Putative glyoxalase/bleomycin resistance protein |
| SSP1462 | S | Putative MccC family protein                     |

#### Other function assigned

|         |    |                                                  |
|---------|----|--------------------------------------------------|
| SSP0067 | -  | Putative glycosyl transferase                    |
| SSP0291 | -  | Putative 6-pyruvoyl tetrahydrobiopterin synthase |
| SSP0091 | C  | Putative monooxygenase                           |
| SSP0188 | C  | Succinate-semialdehyde dehydrogenase             |
| SSP0249 | C  | Lactate dehydrogenase                            |
| SSP0281 | C  | Conserved hypothetical protein                   |
| SSP0389 | C  | Putative aldehyde dehydrogenase                  |
| SSP0520 | C  | Putative oxidoreductase                          |
| SSP0521 | C  | Putative oxidoreductase                          |
| SSP0563 | C  | Putative L-ribulokinase                          |
| SSP1001 | C  | L-lactate dehydrogenase                          |
| SSP1236 | C  | Phosphotransacetylase, partial                   |
| SSP2178 | C  | L-ribulokinase                                   |
| SSP2190 | C  | Putative oxidoreductase                          |
| SSP1634 | CR | Putative alcohol dehydrogenase                   |
| SSP0126 | E  | Putative arginase                                |

|          |    |                                                                                                |
|----------|----|------------------------------------------------------------------------------------------------|
| SSP0187  | E  | 4-Aminobutyrate aminotransferase                                                               |
| SSP0224  | E  | Putative succinyl-diaminopimelate desuccinylase                                                |
| SSP0251  | E  | O-acetylhomoserine sulfhydrylase                                                               |
| SSP0338  | E  | Putative 1-aminocyclopropane-1-carboxylate deaminase                                           |
| SSP0346  | E  | Putative succinyl-diaminopimelate desuccinylase                                                |
| SSP0368  | E  | Putative succinyl-diaminopimelate desuccinylase, truncated                                     |
| SSP0369  | E  | Putative succinyl-diaminopimelate desuccinylase, truncated                                     |
| SSP0421  | E  | Putative glyoxalase family protein                                                             |
| SSP0432  | E  | D-serine dehydratase                                                                           |
| SSP0466  | E  | Putative peptidase                                                                             |
| SSP0823  | E  | Acetolactate synthase, small subunit                                                           |
| SSP0934  | E  | Aspartate 1-decarboxylase precursor, truncated                                                 |
| SSP1386  | E  | Putative phosphoglycerate dehydrogenase                                                        |
| SSP1892  | E  | Putative lactoylglutathione lyase                                                              |
| SSP2052  | E  | Putative methionine synthase II (cobalamin-independent)                                        |
| SSP2172  | E  | Putative homocysteine S-methyltransferase                                                      |
| SSP2174* | E  | NAD-specific glutamate dehydrogenase                                                           |
| SSP2175  | E  | Putative agmatinase                                                                            |
| SSP2293  | EG | Dihydroxyacid dehydratase/phosphogluconate dehydratase                                         |
| SSP0366  | ER | Sorbitol dehydrogenase                                                                         |
| SSP0524  | ER | Putative dehydrogenase                                                                         |
| SSP1623  | ER | Alcohol dehydrogenase                                                                          |
| SSP2179  | ER | Putative dehydrogenase                                                                         |
| SSP0287  | F  | Putative inosine-uridine preferring nucleoside hydrolase                                       |
| SSP0747  | F  | Deoxyribose-phosphate aldolase                                                                 |
| SSP0951  | F  | Putative formyltetrahydrofolate hydrolase                                                      |
| SSP1600  | F  | Putative adenylate kinase, truncated                                                           |
| SSP1601  | F  | Putative adenylate kinase, truncated                                                           |
| SSP1735  | F  | Inosine-uridine preferring nucleoside hydrolase                                                |
| SSP2398  | F  | Putative adenosine deaminase                                                                   |
| SSP0097  | G  | Putative $\beta$ -mannosidase precursor, truncated                                             |
| SSP0098  | G  | Putative $\beta$ -D-mannosidase, truncated                                                     |
| SSP0105  | G  | $\beta$ -D-galactosidase                                                                       |
| SSP0125  | G  | $\beta$ -Glucosidase                                                                           |
| SSP0235* | G  | Putative glucosamine-6-phosphate isomerase, partial                                            |
| SSP0380  | G  | $\beta$ -Glucosidase, truncated                                                                |
| SSP0413  | G  | Putative 2 deoxy-D-gluconate 3-dehydrogenase, truncated                                        |
| SSP0497  | G  | Putative $\beta$ -glucosidase/6-phospho- $\beta$ -glucosidase/ $\beta$ -galactosidase, partial |
| SSP0525  | G  | Dihydroxyacetone kinase                                                                        |
| SSP0526  | G  | Dihydroxyacetone kinase                                                                        |
| SSP0629  | G  | Galactokinase                                                                                  |
| SSP0631  | G  | Putative galactose-1-phosphate uridylyltransferase                                             |
| SSP1032  | G  | Formyltetrahydrofolate synthetase, truncated                                                   |
| SSP1331  | G  | Putative sugar phosphate isomerase/epimerase                                                   |
| SSP1612  | G  | Sorbitol dehydrogenase, partial                                                                |
| SSP1626  | G  | Putative hexulose-6-phosphate synthase                                                         |
| SSP2148  | G  | Putative hexulose-6-phosphate synthase                                                         |
| SSP2183  | G  | Putative 2-dehydro-3-deoxyphosphogluconate aldolase/4-hydroxy-2-oxoglutarate aldolase          |
| SSP0018  | GC | Putative glycosyltransferase                                                                   |
| SSP0119  | H  | Putative dihydrofolate reductase                                                               |
| SSP1335  | H  | Putative dihydrofolate reductase family                                                        |
| SSP2205  | H  | Putative 2-amino-3-ketobutyrate coenzyme A ligase                                              |
| SSP2406  | H  | Uroporphyrin-III C-methyltransferase                                                           |
| SSP0185  | I  | Putative cardiolipin synthase                                                                  |
| SSP0501  | I  | Lipase precursor (Glycerol ester hydrolase), truncated                                         |
| SSP1638  | I  | Putative lipase                                                                                |
| SSP1894  | I  | Putative lysophospholipase                                                                     |
| SSP2199  | I  | Succinyl-CoA:3-ketoacid-coenzyme A transferase subunit B                                       |
| SSP2200  | I  | Succinyl-CoA:3-ketoacid-coenzyme A transferase subunit A                                       |
| SSP2296  | I  | Lipase precursor, truncated                                                                    |
| SSP2297  | I  | Lipase precursor, truncated                                                                    |
| SSP2396  | I  | Putative phospholipid phosphatase                                                              |
| SSP1558  | J  | Putative acetyltransferase                                                                     |
| SSP2202  | J  | Putative acetyltransferase                                                                     |
| SSP2294  | J  | Putative acetyltransferase                                                                     |
| SSP0341  | KR | Putative acetyltransferase                                                                     |
| SSP0420  | KR | Putative acetyltransferase                                                                     |
| SSP0472  | KR | Putative acetyltransferase                                                                     |
| SSP0028  | L  | Putative DNA modification methylase                                                            |
| SSP0029  | L  | Putative modification methylase                                                                |
| SSP0052  | L  | Putative restriction endonuclease S subunit                                                    |

|         |    |                                                                     |
|---------|----|---------------------------------------------------------------------|
| SSP0073 | L  | Putative restriction endonuclease                                   |
| SSP0289 | L  | Putative DNA-3-methyladenine glycosidase                            |
| SSP1670 | L  | Putative excinuclease ABC, subunit A, truncated                     |
| SSP1671 | L  | Putative excinuclease ABC, subunit A, truncated                     |
| SSP0059 | M  | UTP-glucose-1-phosphate uridylyltransferase                         |
| SSP0064 | M  | Putative glycosyltransferase                                        |
| SSP0065 | M  | Putative glycosyl transferase                                       |
| SSP0076 | M  | Putative glycosyl transferase                                       |
| SSP0107 | M  | Putative glucosyl transferase                                       |
| SSP1302 | M  | Putative extracellular amidase                                      |
| SSP1599 | M  | Putative glycosyltransferase                                        |
| SSP2147 | M  | Putative 6-phospho-3-hexuloisomerase                                |
| SSP2357 | N  | Putative extracellular amidase                                      |
| SSP1050 | NO | Putative protease                                                   |
| SSP1637 | O  | Putative glutathione peroxidase, partial                            |
| SSP1058 | P  | Putative copper homeostasis protein                                 |
| SSP2168 | P  | Putative alkylphosphonate uptake protein                            |
| SSP2418 | P  | Sulfite reductase flavoprotein subunit                              |
| SSP0114 | QR | Putative oxidoreductase, short chain dehydrogenase/reductase family |
| SSP0192 | QR | Putative SAM-dependent methyltransferase                            |
| SSP0201 | QR | Putative oxidoreductase, short-chain dehydrogenase/reductase family |
| SSP0414 | QR | Putative 2 deoxy-D-gluconate 3-dehydrogenase, truncated             |
| SSP1627 | QR | Putative dehydrogenase                                              |
| SSP2198 | QR | Putative oxidoreductase                                             |
| SSP0081 | R  | Putative malate:quinone oxidoreductase                              |
| SSP0096 | R  | Putative monooxygenase, truncated                                   |
| SSP0099 | R  | Putative amidohydrolase, truncated                                  |
| SSP0100 | R  | Putative amidohydrolase, truncated                                  |
| SSP0101 | R  | Putative metal-dependent hydrolase                                  |
| SSP0156 | R  | Putative malate:quinone oxidoreductase                              |
| SSP0205 | R  | Putative acetyltransferase                                          |
| SSP0226 | R  | Putative FMN reductase, NADPH-dependent                             |
| SSP0236 | R  | Similar to quorum-quenching N-acyl homoserine lactonase             |
| SSP0247 | R  | Putative metal-dependent membrane protease                          |
| SSP0276 | R  | Putative hydrolase                                                  |
| SSP0318 | R  | Putative esterase of $\alpha/\beta$ hydrolase superfamily           |
| SSP0355 | R  | Putative zinc-binding dehydrogenase                                 |
| SSP0367 | R  | Putative 2-haloalkanoic acid dehalogenase                           |
| SSP0377 | R  | Putative NADPH-quinone reductase                                    |
| SSP0502 | R  | Lipase precursor (Glycerol ester hydrolase), truncated              |
| SSP0635 | R  | Putative metal-dependent hydrolase                                  |
| SSP1306 | R  | Putative esterase                                                   |
| SSP1333 | R  | Putative lipopolysaccharide biosynthesis protein                    |
| SSP1358 | R  | Putative aldo/keto reductase                                        |
| SSP1891 | R  | Putative acetyltransferase                                          |
| SSP1899 | R  | Putative hydrolase, partial                                         |
| SSP1904 | R  | Putative haloacid dehalogenase-like hydrolase                       |
| SSP2204 | R  | Putative kinase                                                     |
| SSP2392 | R  | Putative carboxypeptidase, partial                                  |
| SSP2397 | R  | Putative methyltransferase                                          |
| SSP2431 | R  | Putative hydrolase                                                  |
| SSP2433 | R  | Aldo/keto reductase family protein                                  |
| SSP0117 | S  | Conserved hypothetical protein                                      |
| SSP0118 | S  | Conserved hypothetical protein                                      |
| SSP0120 | S  | Conserved hypothetical protein                                      |
| SSP0440 | S  | Conserved hypothetical protein                                      |
| SSP0473 | S  | Lipoprotein precursor, truncated                                    |
| SSP0474 | S  | Lipoprotein precursor, truncated                                    |
| SSP0511 | S  | Hypothetical protein                                                |
| SSP1332 | S  | Conserved hypothetical protein                                      |
| SSP2315 | S  | Conserved hypothetical protein                                      |
| SSP2346 | S  | Hypothetical protein                                                |
| Unknown |    |                                                                     |
| SSP0027 | S  | Hypothetical protein                                                |
| SSP0032 | S  | Hypothetical protein                                                |
| SSP0033 | S  | Hypothetical protein                                                |
| SSP0034 | S  | Hypothetical protein                                                |
| SSP0037 | S  | Hypothetical protein                                                |
| SSP0040 | S  | Hypothetical protein                                                |
| SSP0041 | S  | Hypothetical protein                                                |

|         |   |                                                    |
|---------|---|----------------------------------------------------|
| SSP0042 | S | Hypothetical protein                               |
| SSP0043 | S | Hypothetical protein                               |
| SSP0044 | S | Hypothetical protein                               |
| SSP0045 | S | Hypothetical protein                               |
| SSP0047 | S | Hypothetical protein                               |
| SSP0048 | S | Hypothetical protein                               |
| SSP0049 | S | Hypothetical protein                               |
| SSP0050 | S | Hypothetical protein                               |
| SSP0051 | S | Hypothetical protein                               |
| SSP0055 | S | Hypothetical protein                               |
| SSP0056 | S | Hypothetical protein                               |
| SSP0057 | S | Hypothetical protein, truncated                    |
| SSP0058 | S | Conserved hypothetical protein, truncated          |
| SSP0072 | - | Capsular polysaccharide synthesis protein, partial |
| SSP0075 | S | Hypothetical protein                               |
| SSP0077 | S | Hypothetical protein                               |
| SSP0078 | S | Hypothetical protein                               |
| SSP0079 | S | Hypothetical protein                               |
| SSP0080 | I | Hypothetical protein                               |
| SSP0106 | S | Conserved hypothetical protein, truncated          |
| SSP0109 | S | Hypothetical protein, truncated                    |
| SSP0113 | S | Hypothetical protein                               |
| SSP0121 | S | Hypothetical protein                               |
| SSP0128 | S | Hypothetical protein                               |
| SSP0131 | S | Immunodominant antigen                             |
| SSP0140 | S | Conserved hypothetical protein                     |
| SSP0141 | S | Hypothetical protein                               |
| SSP0143 | S | Hypothetical protein                               |
| SSP0149 | S | Conserved hypothetical protein, truncated          |
| SSP0150 | R | Conserved hypothetical protein, truncated          |
| SSP0158 | - | Biofilm-associated surface protein, truncated      |
| SSP0159 | - | Biofilm-associated surface protein, truncated      |
| SSP0160 | - | Biofilm-associated surface protein, truncated      |
| SSP0161 | S | Hypothetical protein                               |
| SSP0162 | S | Hypothetical protein                               |
| SSP0163 | S | Hypothetical protein                               |
| SSP0168 | R | Putative RNA binding protein                       |
| SSP0169 | S | Conserved hypothetical protein                     |
| SSP0173 | S | Hypothetical protein                               |
| SSP0197 | S | Hypothetical protein                               |
| SSP0199 | S | Conserved hypothetical protein                     |
| SSP0200 | S | Conserved hypothetical protein                     |
| SSP0202 | S | Conserved hypothetical protein                     |
| SSP0228 | S | Conserved hypothetical protein, partial            |
| SSP0229 | S | Hypothetical protein                               |
| SSP0239 | S | Conserved hypothetical protein                     |
| SSP0257 | R | Conserved hypothetical protein                     |
| SSP0258 | S | Hypothetical protein                               |
| SSP0284 | S | Conserved hypothetical protein, truncated          |
| SSP0285 | S | Conserved hypothetical protein, truncated          |
| SSP0305 | S | Hypothetical protein                               |
| SSP0308 | S | Conserved hypothetical protein                     |
| SSP0309 | S | Hypothetical protein                               |
| SSP0310 | - | Similar to intercellular adhesion protein C        |
| SSP0321 | S | Hypothetical protein                               |
| SSP0358 | S | Conserved hypothetical protein                     |
| SSP0384 | S | Hypothetical protein                               |
| SSP0415 | S | Conserved hypothetical protein                     |
| SSP0416 | S | Hypothetical protein                               |
| SSP0438 | S | Hypothetical protein                               |
| SSP0446 | S | Conserved hypothetical protein, truncated          |
| SSP0467 | S | Hypothetical protein                               |
| SSP0468 | S | Conserved hypothetical protein, truncated          |
| SSP0469 | S | Conserved hypothetical protein, truncated          |
| SSP0470 | S | Conserved hypothetical protein                     |
| SSP0482 | S | Hypothetical protein                               |
| SSP0486 | S | Hypothetical protein                               |
| SSP0498 | K | Conserved hypothetical protein                     |
| SSP0504 | O | Putative small heat shock protein                  |
| SSP0515 | S | Conserved hypothetical protein, truncated          |
| SSP0517 | S | Conserved hypothetical protein, truncated          |

|          |   |                                         |
|----------|---|-----------------------------------------|
| SSP0522  | S | Conserved hypothetical protein          |
| SSP0558  | S | Conserved hypothetical protein, partial |
| SSP0597  | S | Hypothetical protein                    |
| SSP0613  | S | Putative secretory antigen precursor    |
| SSP0624  | S | Hypothetical protein                    |
| SSP0697  | S | Conserved hypothetical protein          |
| SSP0730  | S | Conserved hypothetical protein          |
| SSP0830  | S | Conserved hypothetical protein          |
| SSP0845  | G | Hypothetical protein                    |
| SSP0849  | S | Hypothetical protein                    |
| SSP0854  | S | Hypothetical protein                    |
| SSP0868* | S | Hypothetical protein                    |
| SSP0870  | S | Hypothetical protein                    |
| SSP0918  | R | Putative intracellular protease/amidase |
| SSP0942  | S | Hypothetical protein                    |
| SSP0949  | S | Hypothetical protein                    |
| SSP0983  | S | Conserved hypothetical protein, partial |
| SSP0992  | S | Hypothetical protein                    |
| SSP1051  | S | Hypothetical protein                    |
| SSP1055  | S | Hypothetical protein                    |
| SSP1103  | I | Hypothetical protein                    |
| SSP1130  | S | Hypothetical protein                    |
| SSP1135  | S | Hypothetical protein                    |
| SSP1152  | S | Hypothetical protein                    |
| SSP1208  | S | Conserved hypothetical protein          |
| SSP1309  | S | Hypothetical protein                    |
| SSP1310  | C | Conserved hypothetical protein          |
| SSP1338  | S | Hypothetical protein                    |
| SSP1380  | S | Hypothetical protein                    |
| SSP1381  | S | Hypothetical protein                    |
| SSP1383  | S | Hypothetical protein                    |
| SSP1385  | S | Hypothetical protein                    |
| SSP1399  | S | Hypothetical protein                    |
| SSP1400  | S | Hypothetical protein                    |
| SSP1414  | S | Hypothetical protein                    |
| SSP1430  | S | Hypothetical protein                    |
| SSP1441  | S | Hypothetical protein                    |
| SSP1443  | S | Hypothetical protein                    |
| SSP1469  | S | Hypothetical protein                    |
| SSP1472  | S | Hypothetical protein, truncated         |
| SSP1473  | S | Hypothetical protein, truncated         |
| SSP1496  | S | Hypothetical protein, partial           |
| SSP1497  | S | Hypothetical protein                    |
| SSP1498  | S | Hypothetical protein                    |
| SSP1565  | S | Conserved hypothetical protein          |
| SSP1566  | S | Hypothetical protein                    |
| SSP1607  | S | Hypothetical protein                    |
| SSP1613  | S | Hypothetical protein, truncated         |
| SSP1614  | S | Hypothetical protein, truncated         |
| SSP1615  | S | Hypothetical protein, truncated         |
| SSP1616  | S | Hypothetical protein                    |
| SSP1617  | S | Hypothetical protein                    |
| SSP1639  | S | Hypothetical protein                    |
| SSP1699  | S | Hypothetical protein                    |
| SSP1702  | S | Hypothetical protein                    |
| SSP1712  | S | Hypothetical protein                    |
| SSP1728  | C | Putative flavohemoprotein               |
| SSP1734  | S | Hypothetical protein                    |
| SSP1753  | S | Hypothetical protein                    |
| SSP1760  | S | Hypothetical protein                    |
| SSP1766  | S | Hypothetical protein                    |
| SSP1784  | R | Conserved hypothetical protein          |
| SSP1807  | R | Hypothetical protein                    |
| SSP1856  | S | Hypothetical protein                    |
| SSP1863  | N | Conserved hypothetical protein          |
| SSP1876  | S | Hypothetical protein                    |
| SSP1881  | S | Hypothetical protein                    |
| SSP1883  | S | Hypothetical protein                    |
| SSP1884  | S | Hypothetical protein                    |
| SSP1885  | S | Hypothetical protein                    |
| SSP1887  | S | Hypothetical protein                    |

|          |   |                                         |
|----------|---|-----------------------------------------|
| SSP1888  | S | Hypothetical protein                    |
| SSP1889  | S | Hypothetical protein                    |
| SSP1890  | S | Hypothetical protein                    |
| SSP1893  | S | Hypothetical protein                    |
| SSP1896  | S | Hypothetical protein                    |
| SSP1897* | S | Conserved hypothetical protein          |
| SSP1898  | S | Hypothetical protein                    |
| SSP1900  | S | Hypothetical protein                    |
| SSP1901  | S | Hypothetical protein                    |
| SSP1902  | S | Hypothetical protein                    |
| SSP1903  | J | Hypothetical protein                    |
| SSP1905  | S | Hypothetical protein                    |
| SSP1911  | S | Hypothetical protein                    |
| SSP1918  | S | Hypothetical protein                    |
| SSP1920  | S | Hypothetical protein                    |
| SSP1922  | S | Hypothetical protein                    |
| SSP1925  | S | Hypothetical protein, partial           |
| SSP1927  | S | Hypothetical protein, partial           |
| SSP1928* | S | Hypothetical protein                    |
| SSP1930  | S | Hypothetical protein                    |
| SSP1932  | S | Hypothetical protein                    |
| SSP1933  | S | Hypothetical protein                    |
| SSP1934  | S | Hypothetical protein                    |
| SSP1935  | S | Hypothetical protein                    |
| SSP1936  | S | Hypothetical protein                    |
| SSP1937  | S | Hypothetical protein                    |
| SSP1938  | S | Hypothetical protein                    |
| SSP1939  | S | Hypothetical protein                    |
| SSP1941  | S | Hypothetical protein                    |
| SSP1942  | S | Hypothetical protein                    |
| SSP1943  | S | Hypothetical protein                    |
| SSP1948  | S | Conserved hypothetical protein, partial |
| SSP1992  | S | Hypothetical protein                    |
| SSP2004  | S | Hypothetical protein                    |
| SSP2022  | S | Hypothetical protein                    |
| SSP2028  | S | Conserved hypothetical protein          |
| SSP2036  | S | Hypothetical protein, truncated         |
| SSP2100  | S | Hypothetical protein                    |
| SSP2102  | S | Conserved hypothetical protein          |
| SSP2126  | S | Hypothetical protein                    |
| SSP2138  | S | Hypothetical protein                    |
| SSP2139  | S | Conserved hypothetical protein          |
| SSP2159  | S | Hypothetical protein                    |
| SSP2161  | S | Hypothetical protein                    |
| SSP2162  | S | Hypothetical protein                    |
| SSP2169  | S | Hypothetical protein                    |
| SSP2170  | S | Conserved hypothetical protein          |
| SSP2177  | S | Hypothetical protein                    |
| SSP2182  | Q | Hypothetical protein                    |
| SSP2187  | S | Hypothetical protein                    |
| SSP2188  | S | Hypothetical protein                    |
| SSP2191  | S | Conserved hypothetical protein          |
| SSP2193  | S | Hypothetical protein                    |
| SSP2197  | S | Hypothetical protein                    |
| SSP2203  | S | Hypothetical protein                    |
| SSP2300  | S | Conserved hypothetical protein          |
| SSP2301  | S | Hypothetical protein                    |
| SSP2302  | S | Hypothetical protein                    |
| SSP2307  | S | Conserved hypothetical protein          |
| SSP2312* | K | Cold shock protein                      |
| SSP2314  | S | Hypothetical protein                    |
| SSP2317  | S | Hypothetical protein                    |
| SSP2318  | S | Hypothetical protein                    |
| SSP2319  | S | Hypothetical protein                    |
| SSP2320  | S | Hypothetical protein                    |
| SSP2321  | S | Hypothetical protein                    |
| SSP2330  | S | Hypothetical protein                    |
| SSP2336  | S | Hypothetical protein                    |
| SSP2344  | S | Hypothetical protein                    |
| SSP2345  | S | Hypothetical protein                    |
| SSP2347  | S | Hypothetical protein                    |

|         |   |                                           |
|---------|---|-------------------------------------------|
| SSP2350 | S | Conserved hypothetical protein            |
| SSP2356 | S | Hypothetical protein, partial             |
| SSP2358 | S | Hypothetical protein                      |
| SSP2360 | S | Hypothetical protein                      |
| SSP2362 | S | Conserved hypothetical protein, partial   |
| SSP2363 | S | Conserved hypothetical protein            |
| SSP2364 | S | Hypothetical protein                      |
| SSP2365 | S | Hypothetical protein                      |
| SSP2366 | S | Hypothetical protein                      |
| SSP2367 | S | Hypothetical protein                      |
| SSP2368 | S | Hypothetical protein                      |
| SSP2369 | S | Hypothetical protein                      |
| SSP2370 | S | Hypothetical protein                      |
| SSP2381 | S | Conserved hypothetical protein            |
| SSP2382 | S | Conserved hypothetical protein            |
| SSP2387 | S | Hypothetical protein                      |
| SSP2390 | S | Hypothetical protein                      |
| SSP2394 | S | Conserved hypothetical protein, truncated |
| SSP2399 | S | Hypothetical protein                      |
| SSP2400 | S | Hypothetical protein                      |
| SSP2419 | S | Conserved hypothetical protein            |
| SSP2422 | S | Conserved hypothetical protein            |
| SSP2429 | S | Hypothetical protein                      |
| SSP2434 | S | Hypothetical protein                      |
| SSP2436 | S | Hypothetical protein                      |
| SSP2437 | S | Hypothetical protein                      |
| SSP2440 | T | Carbon starvation protein CstA            |

---

\*cognate gene was identified in the genome sequence of other staphylococcal strains

†Classification based on COGs category described in Fig. 1.
