# Supplementary material
Source: PubMed Central journal article supplement (PMC1201578)
Supplement: pnas_0502950102_6.pdf [file pnas_0502950102_6.pdf]

**Table 4.** Nonorthologous ORFs in *Staphylococcus aureus* N315

| ORF ID                    | COG* | Product                                                                                    |
|---------------------------|------|--------------------------------------------------------------------------------------------|
| <b>Transport systems</b>  |      |                                                                                            |
| SA0106                    | C    | L-lactate permease homologue                                                               |
| SA1270                    | E    | Hypothetical protein, similar to amino acid permease                                       |
| SA2227                    | E    | Truncated hypothetical protein, similar to D-serine/D-alanine/glycine transporter          |
| SA2234                    | E    | Probable glycine betaine/carnitine/choline ABC transporter opuCD                           |
| SA2237                    | E    | Glycine betaine/carnitine/choline ABC transporter opuCA                                    |
| SA0199                    | EP   | Truncated hypothetical protein, similar to oligopeptide ABC transporter permease           |
| SA0200                    | EP   | Hypothetical protein, similar to dipeptide transporter protein dppC                        |
| SA0850                    | EP   | Hypothetical protein, similar to oligopeptide ABC transporter oligopeptide-binding protein |
| SA0851                    | EP   | Oligopeptide ABC transporter ATP-binding protein homologue                                 |
| SA0852                    | EP   | Oligopeptide transport system ATP-binding protein AppF homologue                           |
| SA0853                    | EP   | Probable oligopeptide transport system permease protein OppB                               |
| SA0854                    | EP   | Hypothetical protein, similar to oligopeptide transport system permease protein OppC       |
| SA0302                    | F    | Probable pyrimidine nucleoside transport protein                                           |
| SA0207                    | G    | Hypothetical protein, similar to maltose/maltodextrin-binding protein                      |
| SA0237                    | G    | Hypothetical protein, similar to PTS, galactitol-specific IIB component                    |
| SA0238                    | G    | Probable PTS galactitol-specific enzyme IIC component                                      |
| SA0255                    | G    | Hypothetical protein, similar to PTS $\beta$ -glucoside-specific enzyme II, ABC component  |
| SA0319                    | G    | Conserved hypothetical protein                                                             |
| SA2326                    | G    | PTS system, glucose-specific IIBC component                                                |
| SA0115                    | GEPR | Hypothetical protein, similar to multi-drug resistance efflux pump                         |
| SA0132                    | GEPR | Hypothetical protein, similar to tetracyclin resistance protein                            |
| SA0263                    | GEPR | Hypothetical protein, similar to proton antiporter efflux pump                             |
| SA1269                    | GEPR | Blt-like protein                                                                           |
| SA1341                    | GEPR | Hypothetical protein, similar to export protein SpcT protein                               |
| SA1970                    | GEPR | Hypothetical protein, similar to multidrug resistance protein                              |
| SA2283                    | GEPR | Conserved hypothetical protein                                                             |
| SA0236                    | GT   | Hypothetical protein, similar to PTS fructose-specific enzyme IIBC component               |
| SA0320                    | GT   | Hypothetical protein, similar to PTS fructose-specific enzyme IIBC component               |
| SA0977                    | M    | Cell surface protein                                                                       |
| SA0978                    | M    | Conserved hypothetical protein                                                             |
| SA0068                    | P    | Potassium-transporting ATPase A chain homologue                                            |
| SA0070                    | P    | Potassium-transporting ATPase B chain homologue                                            |
| SA0071                    | P    | Potassium-transporting ATPase C chain homologue                                            |
| SA0111                    | P    | Lipoprotein                                                                                |
| SA0645                    | P    | Conserved hypothetical protein                                                             |
| SA0891                    | P    | Hypothetical protein, similar to ferrichrome ABC transporter                               |
| SA0980                    | P    | Hypothetical protein, similar to ferrichrome ABC transporter                               |
| SA1016                    | P    | Conserved hypothetical protein                                                             |
| SA1732                    | P    | Hypothetical protein, similar to sodium-dependent transporter                              |
| SA1879                    | P    | Probable potassium-transporting ATPase C chain                                             |
| SA1880                    | P    | Probable potassium-transporting ATPase B chain                                             |
| SA1881                    | P    | Probable potassium-transporting ATPase A chain                                             |
| SA2475                    | P    | Conserved hypothetical protein                                                             |
| SA2476                    | P    | Hypothetical protein, similar to cation ABC transporter (ATP-binding protein)              |
| SA2489                    | P    | Hypothetical protein, similar to high-affinity nickel-transport protein                    |
| SA0109                    | PH   | Lipoprotein                                                                                |
| SA0110                    | PH   | Lipoprotein                                                                                |
| SA0981                    | PH   | Hypothetical protein, similar to ferrichrome ABC transporter                               |
| SA0197                    | Q    | Hypothetical protein, similar to ABC transporter ATP-binding protein                       |
| SA2216                    | Q    | Hypothetical protein, similar to ABC transporter, ATP-binding protein                      |
| SA2217                    | Q    | Hypothetical protein, similar to lipoprotein inner membrane ABC-transporter                |
| SA2314                    | Q    | Hypothetical protein, similar to ABC transporter (ATP-binding protein)                     |
| SA0198                    | R    | Oligopeptide transport ATP-binding protein                                                 |
| SA0888                    | R    | Conserved hypothetical protein                                                             |
| SA0318                    | S    | Hypothetical protein, similar to transport protein SgaT                                    |
| SA0976                    | S    | Conserved hypothetical protein                                                             |
| SA1552                    | S    | Hypothetical protein                                                                       |
| <b>Regulation systems</b> |      |                                                                                            |
| SA1949                    | -    | Lytic regulatory protein truncated with Tn554                                              |
| SA0066                    | -    | AgrD protein                                                                               |
| SA0041                    | K    | Xylose repressor homologue                                                                 |
| SA0097                    | K    | Hypothetical protein, similar to transcription regulator AraC/XylS family                  |
| SA0108                    | K    | Staphylococcal accessory regulator A homologue                                             |
| SA0130                    | K    | Hypothetical protein, similar to trehalose operon transcriptional repressor                |
| SA0187                    | K    | Hypothetical protein, similar to transcription regulator                                   |
| SA0254                    | K    | Hypothetical protein, similar to transcription regulator GntR family                       |
| SA0261                    | K    | Hypothetical protein, similar to rbs operon repressor RbsR                                 |
| SA0321                    | K    | Hypothetical protein, similar to transcription antiterminator BglG family                  |
| SA1804                    | K    | Hypothetical transcriptional regulator                                                     |
| SA1805                    | K    | Repressor homologue                                                                        |
| SA1833                    | K    | Hypothetical protein, similar to transcription regulator                                   |
| SA2002                    | K    | Hypothetical protein, similar to transcription regulator MerR family                       |
| SA2092                    | K    | Hypothetical protein, similar to transcription regulator                                   |
| SA2108                    | K    | Hypothetical protein, similar to transcription regulator, RpiR family                      |

|        |    |                                                                                |
|--------|----|--------------------------------------------------------------------------------|
| SA2165 | K  | Hypothetical protein, similar to transcriptional regulator tetR-family         |
| SA2286 | K  | Staphylococcal accessory regulator A homolog                                   |
| SA2287 | K  | Staphylococcal accessory regulator A homolog                                   |
| SA2364 | K  | Hypothetical protein, similar to transcription regulator acrR                  |
| SA2379 | K  | Hypothetical protein, similar to transcriptional regulator tetR-family         |
| SA0067 | T  | Hypothetical protein, similar to kdp operon sensor protein                     |
| SA1248 | T  | Truncated (putative response regulator ArlR                                    |
| SA1882 | T  | Sensor protein KdpD                                                            |
| SA0066 | TK | Hypothetical protein, similar to kdp operon transcriptional regulatory protein |
| SA1883 | TK | KDP operon transcriptional regulatory protein KdpE                             |

#### Mobile elements

|        |   |                                                                        |
|--------|---|------------------------------------------------------------------------|
| SA0028 | - | Truncated replication protein for pUB110 plasmid                       |
| SA0029 | - | Plasmid recombination enzyme                                           |
| SA0050 | - | Transposase for Tn554                                                  |
| SA0063 | - | Transposase                                                            |
| SA0764 | - | Transposase C for Tn554                                                |
| SA1482 | - | Transposase C for Tn554                                                |
| SA1760 | - | Holin homolog                                                          |
| SA1953 | - | Transposition regulatory protein tnpC                                  |
| SAS072 | - | Hypothetical protein, similar to transposase for IS232                 |
| SAS077 | - | Hypothetical protein, similar to transposase for IS232                 |
| SA0026 | L | Transposase for IS-like element                                        |
| SA0051 | L | Transposase B for Tn554                                                |
| SA0052 | L | Transposase A for Tn554                                                |
| SA0356 | L | Truncated integrase                                                    |
| SA0369 | L | Transposase for IS1181                                                 |
| SA0379 | L | Probable transposase                                                   |
| SA0586 | L | Transposase for IS1181                                                 |
| SA0762 | L | Transposase A for Tn554                                                |
| SA0763 | L | Transposase B for Tn554                                                |
| SA0787 | L | Transposase for IS1181                                                 |
| SA1006 | L | Transposase for insertion sequence IS1181                              |
| SA1038 | L | Truncated transposase                                                  |
| SA1222 | L | Truncated transposase                                                  |
| SA1483 | L | Transposase B for Tn554                                                |
| SA1484 | L | Transposase A for Tn554                                                |
| SA1541 | L | Transposase                                                            |
| SA1605 | L | Truncated transposase                                                  |
| SA1605 | L | Truncated transposase                                                  |
| SA1623 | L | Truncated transposase                                                  |
| SA1623 | L | Truncated transposase                                                  |
| SA1624 | L | Transposase homolog for IS232 [Insertion sequence IS1181]              |
| SA1677 | L | Transposase                                                            |
| SA1810 | L | Integrase                                                              |
| SA1820 | L | Hypothetical protein, similar to bacteriophage terminase small subunit |
| SA1884 | L | Transposase                                                            |
| SA1954 | L | Transposition regulatory protein tnpB                                  |
| SA1955 | L | Transposition regulatory protein tnpA                                  |
| SA2013 | L | Truncated IS232 IstB protein homolog                                   |
| SA2014 | L | Truncated IS232 IstA protein homolog                                   |
| SA2289 | L | Transposase                                                            |
| SA0055 | L | Truncated transposase                                                  |
| SAS069 | L | Hypothetical protein, similar to transposase for IS232                 |
| SAS070 | L | Hypothetical protein, similar to transposase for IS232                 |
| SA1777 | R | Hypothetical protein                                                   |
| SA1776 | S | Hypothetical protein                                                   |
| SA1801 | S | Anti repressor                                                         |

#### Virulence factors and antibiotics resistance

|        |   |                                                                                |
|--------|---|--------------------------------------------------------------------------------|
| SA0033 | - | Kanamycin nucleotidyltransferase                                               |
| SA0107 | - | Immunoglobulin G binding protein A precursor                                   |
| SA0126 | - | Hypothetical protein, similar to capsular polysaccharide synthesis protein 14H |
| SA0222 | - | Staphylocoagulase precursor                                                    |
| SA0357 | - | Hypothetical protein, similar to exotoxin 2                                    |
| SA0382 | - | Exotoxin 6                                                                     |
| SA0383 | - | Exotoxin 7                                                                     |
| SA0384 | - | Exotoxin 8                                                                     |
| SA0385 | - | Exotoxin 9                                                                     |
| SA0386 | - | Exotoxin 10                                                                    |
| SA0387 | - | Exotoxin 11                                                                    |
| SA0388 | - | Exotoxin 12                                                                    |
| SA0389 | - | Exotoxin 13                                                                    |
| SA0390 | - | Exotoxin 14                                                                    |
| SA0393 | - | Exotoxin 15                                                                    |
| SA0743 | - | Hypothetical protein, similar to staphylocoagulase precursor                   |
| SA0744 | - | Extracellular ECM and plasma binding protein                                   |
| SA0745 | - | Hypothetical protein, similar to extracellular matrix and plasma binding       |

|        |    |                                                                                                   |
|--------|----|---------------------------------------------------------------------------------------------------|
| SA0841 | -  | Hypothetical protein, similar to cell surface protein Map-w                                       |
| SA0900 | -  | Cysteine protease precursor                                                                       |
| SA1000 | -  | Hypothetical protein, similar to fibrinogen-binding protein                                       |
| SA1003 | -  | Hypothetical protein, similar to fibrinogen-binding protein                                       |
| SA1004 | -  | Hypothetical protein, similar to fibrinogen-binding protein                                       |
| SA1007 | -  | $\alpha$ -Hemolysin precursor                                                                     |
| SA1009 | -  | Hypothetical protein, similar to exotoxin 1                                                       |
| SA1010 | -  | Hypothetical protein, similar to exotoxin 4                                                       |
| SA1011 | -  | Hypothetical protein, similar to exotoxin 3                                                       |
| SA1429 | -  | Enterotoxin homolog                                                                               |
| SA1430 | -  | Hypothetical protein, similar to enterotoxin A precursor                                          |
| SA1637 | -  | Leukotoxin, LukD                                                                                  |
| SA1638 | -  | Leukotoxin LukE                                                                                   |
| SA1642 | -  | Extracellular enterotoxin type G precursor                                                        |
| SA1643 | -  | Enterotoxin SeN                                                                                   |
| SA1644 | -  | Enterotoxin YENT2                                                                                 |
| SA1645 | -  | Enterotoxin Yent1                                                                                 |
| SA1646 | -  | Extracellular enterotoxin type I precursor                                                        |
| SA1647 | -  | Enterotoxin SEM                                                                                   |
| SA1648 | -  | Enterotoxin SeO                                                                                   |
| SA1751 | -  | Truncated map-w protein                                                                           |
| SA1751 | -  | Truncated map-w protein                                                                           |
| SA1752 | -  | Truncated $\beta$ -hemolysin                                                                      |
| SA1758 | -  | Staphylokinase precursor                                                                          |
| SA1761 | -  | Enterotoxin P                                                                                     |
| SA1812 | -  | Hypothetical protein, similar to synergohymenotropic toxin precursor - Staphylococcus intermedius |
| SA1813 | -  | Hypothetical protein, similar to leukocidin chain lukM precursor                                  |
| SA1816 | -  | Extracellular enterotoxin L                                                                       |
| SA1817 | -  | Enterotoxin typeC3                                                                                |
| SA1819 | -  | Toxic shock syndrome toxin-1                                                                      |
| SA2003 | -  | Hyaluronate lyase precursor                                                                       |
| SA2006 | -  | Hypothetical protein, similar to MHC class II analog                                              |
| SA2206 | -  | IgG-binding protein SBI                                                                           |
| SA2207 | -  | $\gamma$ -Hemolysin chain II precursor                                                            |
| SA2208 | -  | $\gamma$ -Hemolysin component C                                                                   |
| SA2209 | -  | $\gamma$ -Hemolysin component B                                                                   |
| SA2290 | -  | Fibronectin-binding protein homolog                                                               |
| SA2460 | -  | Intercellular adhesion protein D                                                                  |
| SAS065 | -  | $\delta$ -Hemolysin                                                                               |
| SA2291 | D  | Fibronectin-binding protein homolog                                                               |
| SA2456 | D  | Capsular polysaccharide biosynthesis, capB                                                        |
| SA0032 | E  | Bleomycin resistance protein                                                                      |
| SA1627 | E  | Serine protease SplF                                                                              |
| SA1628 | E  | Serine protease SplD                                                                              |
| SA1629 | E  | Serine protease SplC                                                                              |
| SA1630 | E  | Serine protease SplB                                                                              |
| SA1631 | E  | Serine protease SplA                                                                              |
| SA0146 | G  | Capsular polysaccharide synthesis enzyme Cap8C                                                    |
| SA2461 | G  | Intercellular adhesion protein B                                                                  |
| SA0048 | J  | rRNA methylase                                                                                    |
| SA0766 | J  | rRNA methylase                                                                                    |
| SA1480 | J  | rRNA methylase Erm(A)                                                                             |
| SA1951 | J  | rRNA methylase Erm(A)                                                                             |
| SA2384 | J  | rRNA methylase Erm(A)                                                                             |
| SA0519 | K  | Ser-Asp rich fibrinogen-binding, bone sialoprotein-binding protein                                |
| SA0742 | K  | Fibrinogen-binding protein A, clumping factor                                                     |
| SA2423 | K  | Clumping factor B                                                                                 |
| SA0746 | L  | Staphylococcal nuclease                                                                           |
| SA0038 | M  | Penicillin binding protein 2' (2a)                                                                |
| SA0125 | M  | Hypothetical protein, similar to Eps(Exopolysaccharide)G                                          |
| SA0150 | M  | Capsular polysaccharide synthesis enzyme Cap5G                                                    |
| SA0152 | M  | Capsular polysaccharide synthesis enzyme Cap5I                                                    |
| SA0155 | M  | Capsular polysaccharide synthesis enzyme Cap5L                                                    |
| SA0159 | M  | Capsular polysaccharide synthesis enzyme Cap5P                                                    |
| SA2457 | M  | Capsular polysaccharide biosynthesis, capA                                                        |
| SA2459 | M  | Intercellular adhesion protein A                                                                  |
| SA0148 | MG | Capsular polysaccharide synthesis enzyme Cap8E                                                    |
| SA0149 | MG | Capsular polysaccharide synthesis enzyme Cap5F                                                    |
| SA0116 | Q  | Hypothetical protein, similar to rhizobactin siderophore biosynthesisprotein RhsC                 |
| SA0117 | Q  | Hypothetical protein, similar to rhizobactin siderophore biosynthesisprotein RhsF                 |
| SA0049 | R  | O-nucleotidyltransferase(9)                                                                       |
| SA0127 | R  | Hypothetical protein, similar to capsular polysaccharide synthesis protein 14L                    |
| SA0765 | R  | O-nucleotidyltransferase(9)                                                                       |
| SA1481 | R  | O-nucleotidyltransferase(9)                                                                       |
| SA1952 | R  | O-nucleotidyltransferase(9)                                                                       |
| SA2385 | R  | O-nucleotidyltransferase(9)                                                                       |
| SA1268 | S  | Hypothetical protein, similar to streptococcal adhesin emb                                        |

## Other function assigned

|        |    |                                                                                                                       |
|--------|----|-----------------------------------------------------------------------------------------------------------------------|
| SA0899 | -  | Cysteine protease                                                                                                     |
| SA1757 | -  | Truncated amidase                                                                                                     |
| SA1757 | -  | Truncated amidase                                                                                                     |
| SA1759 | -  | Lytic enzyme                                                                                                          |
| SA0220 | C  | Hypothetical protein, similar to glycerophosphodiester phosphodiesterase                                              |
| SA0232 | C  | L-lactate dehydrogenase                                                                                               |
| SA0311 | C  | Hypothetical protein, similar to trimethylamine dehydrogenase (EC 1.5.99.7)                                           |
| SA0510 | C  | Probable L-ribulokinase                                                                                               |
| SA2395 | C  | L-lactate dehydrogenase                                                                                               |
| SA0112 | E  | Hypothetical protein, similar to cysteine synthase                                                                    |
| SA0119 | E  | Hypothetical protein, similar to diaminopimelate decarboxylase                                                        |
| SA0242 | E  | Hypothetical protein, similar to xylitol dehydrogenase                                                                |
| SA0246 | E  | Hypothetical protein, similar to D-xylulose reductase                                                                 |
| SA0313 | E  | Hypothetical protein, similar to glycine cleavage system H protein                                                    |
| SA0837 | E  | Hypothetical protein, similar to 2-isopropylmalate synthase                                                           |
| SA1271 | E  | Threonine deaminase IlvA homolog                                                                                      |
| SA1272 | E  | Alanine dehydrogenase                                                                                                 |
| SA1814 | E  | Hypothetical protein, similar to succinyl-diaminopimelate desuccinylase                                               |
| SA2382 | E  | Truncated hypothetical protein, similar to glutamyl-endopeptidase                                                     |
| SA2389 | E  | Truncated hypothetical protein, similar to metalloproteinase mpr precursor                                            |
| SA2425 | E  | Carbamate kinase                                                                                                      |
| SA0239 | ER | Sorbitol dehydrogenase                                                                                                |
| SA0240 | ER | Sorbitol dehydrogenase homologue                                                                                      |
| SA0022 | F  | Hypothetical protein, similar to 5'-nucleotidase                                                                      |
| SA0131 | F  | Purine nucleoside phosphorylase                                                                                       |
| SA0133 | F  | Deoxyribose-phosphate aldolase                                                                                        |
| SA0234 | F  | Hypothetical protein, similar to inosine-uridine preferring nucleoside hydrolase                                      |
| SA1939 | F  | Deoxyribose-phosphate aldolase                                                                                        |
| SA0118 | G  | Hypothetical protein, similar to various aldolase                                                                     |
| SA0212 | G  | Conserved hypothetical protein                                                                                        |
| SA0256 | G  | 6-Phospho- $\beta$ -glucosidase                                                                                       |
| SA1991 | G  | 6-Phospho- $\beta$ -galactosidase                                                                                     |
| SA0316 | H  | Hypothetical protein, similar to lipoate-protein ligase                                                               |
| SA0508 | H  | Hypothetical protein, similar to glycine C-acetyltransferase                                                          |
| SA2186 | H  | Uroporphyrin-III C-methyl transferase                                                                                 |
| SA2212 | H  | Hypothetical protein, similar to 8-amino-7-oxononanoate synthase                                                      |
| SA0091 | I  | 1-Phosphatidylinositol phosphodiesterase precursor                                                                    |
| SA1155 | I  | Cardiolipin synthetase homolog                                                                                        |
| SA2349 | I  | Squalene synthase                                                                                                     |
| SA0426 | KR | Conserved hypothetical protein                                                                                        |
| SA0392 | L  | Probable restriction modification system specificity subunit                                                          |
| SA1625 | L  | Probable specificity determinant HsdS                                                                                 |
| SA1626 | L  | Type I restriction enzyme EcoR124II M PROTEIN homolog [Pathogenicity island SaPln3]                                   |
| SA1806 | L  | Probable ATP-dependent helicase                                                                                       |
| SA2010 | L  | Hypothetical protein, similar to RNA-directed DNA polymerase from retron EC86                                         |
| SA2277 | L  | Conserved hypothetical protein                                                                                        |
| SA0124 | M  | Hypothetical protein, similar to glycosyltransferase TaaA                                                             |
| SA0243 | M  | Hypothetical protein, similar to teichoic acid biosynthesis protein B                                                 |
| SA0265 | M  | Peptidoglycan hydrolase                                                                                               |
| SA0522 | M  | Hypothetical protein, similar to poly (glycerol-phosphate) $\alpha$ -glucosyltransferase (teichoic acid biosynthesis) |
| SA1766 | M  | Hypothetical protein                                                                                                  |
| SA1808 | M  | Probable ss-1,3-N-acetylglucosaminyltransferase                                                                       |
| SA2350 | M  | Conserved hypothetical protein                                                                                        |
| SA0317 | MG | Hypothetical protein, similar to dihydroflavonol-4-reductase                                                          |
| SA1775 | NO | Hypothetical protein, similar to scaffolding protein                                                                  |
| SA2336 | O  | ATP-dependent Clp proteinase chain clpL                                                                               |
| SA0128 | P  | Superoxide dismutase                                                                                                  |
| SA0332 | P  | Conserved hypothetical protein                                                                                        |
| SA0181 | Q  | Hypothetical protein, similar to isochorismatase                                                                      |
| SA0301 | Q  | Conserved hypothetical protein                                                                                        |
| SA2348 | Q  | Squalene desaturase                                                                                                   |
| SA2365 | QR | Hypothetical protein, similar to short chain oxidoreductase                                                           |
| SA0043 | R  | Conserved hypothetical protein                                                                                        |
| SA0084 | R  | Hypothetical protein, similar to homo sapiens CGI-44 protein, PRO1975 protein                                         |
| SA0211 | R  | Hypothetical protein, similar to NADH-dependent dehydrogenase                                                         |
| SA0309 | R  | Glycerol ester hydrolase                                                                                              |
| SA0328 | R  | Hypothetical protein, similar to NADH-dependent FMN reductase                                                         |
| SA0741 | R  | Conserved hypothetical protein                                                                                        |
| SA2001 | R  | Hypothetical protein, similar to oxidoreductase, aldo/keto reductase family                                           |
| SA2106 | R  | Hypothetical protein, similar to protein of pXO2-46                                                                   |
| SA2259 | R  | Conserved hypothetical protein                                                                                        |
| SA2366 | R  | Conserved hypothetical protein                                                                                        |
| SA2380 | R  | Conserved hypothetical protein                                                                                        |
| SA2400 | R  | Malate:quinone oxidoreductase                                                                                         |
| SA0314 | S  | Conserved hypothetical protein                                                                                        |
| SA0982 | S  | NPQTN specific sortase B                                                                                              |
| SA0077 | T  | Hypothetical protein, similar to serine/threonine protein kinase                                                      |

## Unknown

|        |     |                                                                                     |
|--------|-----|-------------------------------------------------------------------------------------|
| SA0024 | S   | Hypothetical protein                                                                |
| SA0025 | S   | Hypothetical protein                                                                |
| SA0028 | -   | Truncated replication protein for plasmid                                           |
| SA0030 | S   | Hypothetical protein                                                                |
| SA0031 | S   | Hypothetical protein                                                                |
| SA0035 | I   | Probable HMG-CoA synthase                                                           |
| SA0037 | I   | Conserved hypothetical protein                                                      |
| SA0042 | P   | Conserved hypothetical protein                                                      |
| SA0046 | R   | Conserved hypothetical protein                                                      |
| SA0047 | Q   | Hypothetical protein in transposon Tn554                                            |
| SA0053 | L   | Truncated hypothetical protein, similar to DNA repair protein                       |
| SA0055 | S   | Conserved hypothetical protein                                                      |
| SA0056 | S   | Hypothetical protein                                                                |
| SA0065 | S   | Conserved hypothetical protein                                                      |
| SA0072 | S   | Hypothetical protein                                                                |
| SA0073 | S   | Hypothetical protein                                                                |
| SA0074 | S   | Hypothetical protein                                                                |
| SA0075 | S   | Hypothetical protein                                                                |
| SA0076 | S   | Hypothetical protein                                                                |
| SA0078 | S   | Hypothetical protein                                                                |
| SA0079 | J   | Conserved hypothetical protein                                                      |
| SA0081 | S   | Conserved hypothetical protein                                                      |
| SA0082 | S   | Conserved hypothetical protein                                                      |
| SA0086 | S   | Hypothetical protein                                                                |
| SA0087 | K   | Hypothetical protein                                                                |
| SA0088 | S   | Hypothetical protein                                                                |
| SA0090 | S   | Hypothetical protein                                                                |
| SA0092 | S   | Hypothetical protein                                                                |
| SA0093 | S   | Hypothetical protein                                                                |
| SA0094 | S   | Hypothetical protein                                                                |
| SA0095 | S   | Hypothetical protein                                                                |
| SA0096 | S   | Hypothetical protein                                                                |
| SA0101 | S   | Hypothetical protein                                                                |
| SA0103 | GER | Conserved hypothetical protein                                                      |
| SA0105 | S   | Hypothetical protein                                                                |
| SA0114 | Q   | Conserved hypothetical protein                                                      |
| SA0120 | K   | Hypothetical protein                                                                |
| SA0121 | S   | Hypothetical protein                                                                |
| SA0129 | S   | Hypothetical protein                                                                |
| SA0141 | S   | Hypothetical protein                                                                |
| SA0142 | E   | Hypothetical protein, similar to DNA-binding protein                                |
| SA0161 | S   | Conserved hypothetical protein                                                      |
| SA0164 | S   | Hypothetical protein                                                                |
| SA0188 | S   | Hypothetical protein                                                                |
| SA0191 | Q   | Conserved hypothetical protein                                                      |
| SA0194 | S   | Hypothetical protein                                                                |
| SA0195 | S   | Hypothetical protein                                                                |
| SA0196 | S   | Conserved hypothetical protein                                                      |
| SA0201 | EP  | RGD-containing lipoprotein                                                          |
| SA0203 | S   | Hypothetical protein                                                                |
| SA0204 | I   | Hypothetical protein                                                                |
| SA0221 | S   | Hypothetical protein                                                                |
| SA0235 | K   | Hypothetical protein, similar to BglG antiterminator family                         |
| SA0241 | I   | Hypothetical protein, similar to 4-diphosphocytidyl-2C-methyl-D-erythritol synthase |
| SA0257 | QR  | Conserved hypothetical protein                                                      |
| SA0270 | R   | Hypothetical protein, similar to secretory antigen precursor SsaA                   |
| SA0271 | S   | Conserved hypothetical protein                                                      |
| SA0272 | S   | Hypothetical protein, similar to transmembrane protein Tmp7                         |
| SA0273 | S   | Hypothetical protein                                                                |
| SA0274 | S   | Conserved hypothetical protein                                                      |
| SA0275 | S   | Conserved hypothetical protein                                                      |
| SA0276 | D   | Conserved hypothetical protein                                                      |
| SA0277 | S   | Hypothetical protein                                                                |
| SA0278 | S   | Hypothetical protein                                                                |
| SA0279 | S   | Hypothetical protein                                                                |
| SA0280 | S   | Hypothetical protein                                                                |
| SA0282 | S   | Conserved hypothetical protein                                                      |
| SA0283 | S   | Hypothetical protein                                                                |
| SA0284 | S   | Hypothetical protein                                                                |
| SA0285 | S   | Hypothetical protein                                                                |
| SA0286 | S   | Conserved hypothetical protein                                                      |
| SA0287 | S   | Conserved hypothetical protein                                                      |
| SA0288 | S   | Conserved hypothetical protein                                                      |
| SA0289 | S   | Conserved hypothetical protein                                                      |
| SA0290 | S   | Conserved hypothetical protein                                                      |
| SA0291 | S   | Hypothetical protein                                                                |

|        |   |                                                                        |
|--------|---|------------------------------------------------------------------------|
| SA0292 | S | Hypothetical protein                                                   |
| SA0299 | G | Hypothetical protein, similar to carbohydrate kinase, PfkB family      |
| SA0300 | G | Truncated hypothetical protein                                         |
| SA0308 | S | Conserved hypothetical protein                                         |
| SA0310 | I | Hypothetical protein                                                   |
| SA0315 | H | Hypothetical protein                                                   |
| SA0331 | P | Conserved hypothetical protein                                         |
| SA0333 | P | Conserved hypothetical protein                                         |
| SA0334 | N | Conserved hypothetical protein                                         |
| SA0335 | N | Conserved hypothetical protein                                         |
| SA0341 | S | Hypothetical protein, similar to low temperature requirement A protein |
| SA0358 | S | Conserved hypothetical protein                                         |
| SA0359 | S | Conserved hypothetical protein                                         |
| SA0364 | S | Hypothetical protein                                                   |
| SA0377 | S | Hypothetical protein                                                   |
| SA0378 | S | Hypothetical protein                                                   |
| SA0380 | S | Conserved hypothetical protein                                         |
| SA0394 | S | Hypothetical protein                                                   |
| SA0395 | S | Hypothetical protein                                                   |
| SA0396 | S | Hypothetical protein                                                   |
| SA0397 | S | Hypothetical protein                                                   |
| SA0398 | S | Hypothetical protein                                                   |
| SA0399 | S | Hypothetical protein                                                   |
| SA0400 | S | Hypothetical protein                                                   |
| SA0401 | S | Hypothetical protein                                                   |
| SA0402 | S | Hypothetical protein                                                   |
| SA0403 | S | Hypothetical protein                                                   |
| SA0404 | S | Hypothetical protein                                                   |
| SA0405 | S | Hypothetical protein                                                   |
| SA0406 | S | Hypothetical protein                                                   |
| SA0407 | S | Conserved hypothetical protein                                         |
| SA0408 | S | Hypothetical protein                                                   |
| SA0409 | S | Hypothetical protein                                                   |
| SA0414 | S | Hypothetical protein                                                   |
| SA0532 | S | Hypothetical protein                                                   |
| SA0553 | S | Conserved hypothetical protein                                         |
| SA0555 | S | Conserved hypothetical protein                                         |
| SA0556 | S | Conserved hypothetical protein                                         |
| SA0611 | S | Hypothetical protein                                                   |
| SA0737 | S | Hypothetical protein                                                   |
| SA0738 | S | Hypothetical protein                                                   |
| SA0739 | S | Conserved hypothetical protein                                         |
| SA0761 | S | Conserved hypothetical protein                                         |
| SA0767 | Q | Hypothetical protein within Tn554                                      |
| SA0779 | S | Hypothetical protein                                                   |
| SA0838 | J | Conserved hypothetical protein                                         |
| SA0839 | G | Hypothetical protein                                                   |
| SA0840 | R | Conserved hypothetical protein                                         |
| SA0886 | S | Hypothetical protein, similar to lactococcin 972 immunity factor       |
| SA0889 | S | Hypothetical protein                                                   |
| SA0890 | S | Conserved hypothetical protein                                         |
| SA0930 | S | Hypothetical protein                                                   |
| SA0979 | S | Conserved hypothetical protein                                         |
| SA0983 | R | Conserved hypothetical protein                                         |
| SA1001 | S | Hypothetical protein                                                   |
| SA1002 | S | Hypothetical protein                                                   |
| SA1005 | S | Hypothetical protein                                                   |
| SA1008 | S | Hypothetical protein                                                   |
| SA1017 | S | Hypothetical protein                                                   |
| SA1049 | S | Hypothetical protein                                                   |
| SA1090 | - | LytN protein                                                           |
| SA1091 | S | FmhC protein                                                           |
| SA1151 | S | Hypothetical protein                                                   |
| SA1153 | S | Hypothetical protein                                                   |
| SA1208 | S | Hypothetical protein                                                   |
| SA1210 | S | Hypothetical protein                                                   |
| SA1249 | S | Hypothetical protein                                                   |
| SA1262 | C | Conserved hypothetical protein                                         |
| SA1263 | S | Conserved hypothetical protein                                         |
| SA1278 | S | Hypothetical protein                                                   |
| SA1300 | S | Hypothetical protein                                                   |
| SA1317 | S | Hypothetical protein                                                   |
| SA1319 | S | Hypothetical protein                                                   |
| SA1320 | S | Hypothetical protein                                                   |
| SA1321 | S | Hypothetical protein                                                   |
| SA1332 | S | Hypothetical protein                                                   |
| SA1428 | S | Hypothetical protein                                                   |
| SA1431 | S | Conserved hypothetical protein                                         |

|        |     |                                                                      |
|--------|-----|----------------------------------------------------------------------|
| SA1452 | S   | SigmaB-controlled gene product                                       |
| SA1479 | Q   | Hypothetical protein                                                 |
| SA1610 | S   | Hypothetical protein                                                 |
| SA1616 | S   | Hypothetical protein                                                 |
| SA1617 | -   | Hypothetical protein, similar to latent nuclear antigen              |
| SA1618 | S   | Conserved hypothetical protein                                       |
| SA1620 | S   | Hypothetical protein                                                 |
| SA1621 | S   | Hypothetical protein                                                 |
| SA1632 | S   | Hypothetical protein                                                 |
| SA1633 | -   | Probable $\beta$ -lactamase                                          |
| SA1634 | -   | Truncated hypothetical protein                                       |
| SA1635 | S   | Hypothetical protein                                                 |
| SA1636 | S   | Hypothetical protein                                                 |
| SA1639 | S   | Hypothetical protein                                                 |
| SA1640 | S   | Conserved hypothetical protein                                       |
| SA1641 | S   | Hypothetical protein                                                 |
| SA1706 | S   | Hypothetical protein                                                 |
| SA1738 | S   | Hypothetical protein                                                 |
| SA1753 | S   | Hypothetical protein                                                 |
| SA1754 | S   | Hypothetical protein                                                 |
| SA1755 | S   | Hypothetical protein                                                 |
| SA1762 | S   | Hypothetical protein                                                 |
| SA1763 | S   | Hypothetical protein                                                 |
| SA1764 | S   | Hypothetical protein                                                 |
| SA1765 | S   | Hypothetical protein                                                 |
| SA1767 | S   | Hypothetical protein                                                 |
| SA1768 | S   | Hypothetical protein                                                 |
| SA1769 | S   | Hypothetical protein                                                 |
| SA1770 | S   | Hypothetical protein                                                 |
| SA1771 | S   | Hypothetical protein                                                 |
| SA1772 | S   | Hypothetical protein                                                 |
| SA1773 | S   | Hypothetical protein                                                 |
| SA1774 | S   | Hypothetical protein                                                 |
| SA1778 | S   | Hypothetical protein                                                 |
| SA1779 | S   | Hypothetical protein                                                 |
| SA1780 | S   | Hypothetical protein                                                 |
| SA1781 | S   | Hypothetical protein                                                 |
| SA1782 | S   | Hypothetical protein                                                 |
| SA1783 | S   | Hypothetical protein                                                 |
| SA1784 | S   | Hypothetical protein                                                 |
| SA1785 | S   | Hypothetical protein                                                 |
| SA1786 | S   | Hypothetical protein                                                 |
| SA1787 | S   | Hypothetical protein                                                 |
| SA1788 | S   | Hypothetical protein                                                 |
| SA1789 | L   | Hypothetical protein                                                 |
| SA1790 | S   | Hypothetical protein                                                 |
| SA1791 | L   | Hypothetical protein                                                 |
| SA1792 | L   | Single-strand DNA-binding protein                                    |
| SA1793 | R   | Hypothetical protein                                                 |
| SA1794 | L   | Hypothetical protein                                                 |
| SA1795 | S   | Hypothetical protein                                                 |
| SA1796 | S   | Hypothetical protein                                                 |
| SA1797 | S   | Hypothetical protein                                                 |
| SA1798 | S   | Hypothetical protein                                                 |
| SA1799 | S   | Hypothetical protein                                                 |
| SA1800 | S   | Hypothetical protein                                                 |
| SA1802 | S   | Hypothetical protein                                                 |
| SA1803 | S   | Hypothetical protein                                                 |
| SA1807 | S   | Hypothetical protein                                                 |
| SA1809 | S   | Hypothetical protein                                                 |
| SA1818 | -   | Hypothetical protein, similar to $\beta$ -lactamase                  |
| SA1823 | S   | Hypothetical protein                                                 |
| SA1824 | S   | Hypothetical protein                                                 |
| SA1825 | S   | Hypothetical protein                                                 |
| SA1826 | S   | Hypothetical protein                                                 |
| SA1827 | S   | Hypothetical protein                                                 |
| SA1828 | S   | Hypothetical protein                                                 |
| SA1829 | S   | Hypothetical protein                                                 |
| SA1830 | S   | Hypothetical protein                                                 |
| SA1831 | S   | Hypothetical protein                                                 |
| SA1832 | L   | Hypothetical protein                                                 |
| SA1834 | S   | Hypothetical protein                                                 |
| SA1839 | M   | Hypothetical protein, similar to SdrH                                |
| SA1860 | E   | Hypothetical protein, similar to acetolactate synthase small subunit |
| SA1950 | Q   | Hypothetical protein                                                 |
| SA1964 | LKJ | FmtB protein                                                         |
| SA2000 | S   | Hypothetical protein                                                 |
| SA2009 | S   | Hypothetical protein                                                 |

|        |    |                                                                       |
|--------|----|-----------------------------------------------------------------------|
| SA2011 | S  | Hypothetical protein                                                  |
| SA2012 | S  | Hypothetical protein                                                  |
| SA2015 | S  | Hypothetical protein                                                  |
| SA2093 | R  | Secretory antigen precursor SsaA homolog                              |
| SA2107 | S  | Hypothetical protein                                                  |
| SA2130 | S  | Conserved hypothetical protein                                        |
| SA2177 | S  | Conserved hypothetical protein                                        |
| SA2195 | S  | Conserved hypothetical protein                                        |
| SA2196 | S  | Conserved hypothetical protein                                        |
| SA2210 | -  | Hypothetical protein, similar to BioX protein                         |
| SA2218 | S  | Hypothetical protein                                                  |
| SA2227 | E  | Truncated hypothetical protein                                        |
| SA2245 | S  | Conserved hypothetical protein                                        |
| SA2246 | D  | Hypothetical protein                                                  |
| SA2263 | S  | Hypothetical protein                                                  |
| SA2264 | S  | Hypothetical protein                                                  |
| SA2270 | S  | Hypothetical protein                                                  |
| SA2271 | S  | Hypothetical protein                                                  |
| SA2272 | S  | Hypothetical protein                                                  |
| SA2273 | S  | Hypothetical protein                                                  |
| SA2274 | S  | Hypothetical protein                                                  |
| SA2280 | S  | Hypothetical protein                                                  |
| SA2281 | S  | Hypothetical protein                                                  |
| SA2282 | S  | Hypothetical protein                                                  |
| SA2292 | S  | Hypothetical protein                                                  |
| SA2315 | S  | Conserved hypothetical protein                                        |
| SA2321 | S  | Hypothetical protein                                                  |
| SA2343 | S  | Hypothetical protein                                                  |
| SA2351 | Q  | Hypothetical protein, similar to phytoene dehydrogenase               |
| SA2352 | S  | Hypothetical protein                                                  |
| SA2353 | R  | Hypothetical protein, similar to secretory antigen precursor SsaA     |
| SA2355 | K  | Conserved hypothetical protein                                        |
| SA2359 | S  | Hypothetical protein                                                  |
| SA2362 | MG | Conserved hypothetical protein                                        |
| SA2363 | S  | Hypothetical protein                                                  |
| SA2367 | R  | Conserved hypothetical protein                                        |
| SA2372 | S  | Hypothetical protein                                                  |
| SA2373 | S  | Hypothetical protein                                                  |
| SA2381 | S  | Hypothetical protein                                                  |
| SA2383 | Q  | Hypothetical protein                                                  |
| SA2394 | Q  | Hypothetical protein, similar to $\alpha$ -acetolactate decarboxylase |
| SA2401 | S  | Hypothetical protein                                                  |
| SA2419 | S  | Hypothetical protein                                                  |
| SA2449 | S  | Hypothetical protein                                                  |
| SA2450 | S  | Hypothetical protein                                                  |
| SA2473 | S  | Hypothetical protein                                                  |
| SA2477 | S  | Conserved hypothetical protein                                        |
| SA2478 | S  | Conserved hypothetical protein                                        |
| SA2494 | K  | Cold shock protein cspB                                               |
| SAS002 | S  | Hypothetical protein                                                  |
| SAS003 | S  | Hypothetical protein                                                  |
| SAS004 | S  | Hypothetical protein                                                  |
| SAS005 | S  | Hypothetical protein                                                  |
| SAS006 | S  | Hypothetical protein                                                  |
| SAS008 | S  | Hypothetical protein                                                  |
| SAS011 | S  | Hypothetical protein                                                  |
| SAS012 | S  | Hypothetical protein                                                  |
| SAS013 | S  | Hypothetical protein                                                  |
| SAS014 | S  | Hypothetical protein                                                  |
| SAS015 | S  | Hypothetical protein                                                  |
| SAS017 | S  | Hypothetical protein                                                  |
| SAS019 | S  | Hypothetical protein                                                  |
| SAS021 | S  | Conserved hypothetical protein                                        |
| SAS022 | S  | Truncated conserved hypothetical protein                              |
| SAS024 | S  | Hypothetical protein                                                  |
| SAS026 | S  | Hypothetical protein                                                  |
| SAS028 | S  | Hypothetical protein                                                  |
| SAS029 | -  | Hypothetical protein, similar to lactococcin 972                      |
| SAS034 | S  | Hypothetical protein                                                  |
| SAS035 | S  | Hypothetical protein                                                  |
| SAS036 | S  | Hypothetical protein                                                  |
| SAS038 | S  | Hypothetical protein                                                  |
| SAS043 | S  | Hypothetical protein                                                  |
| SAS045 | S  | Hypothetical protein                                                  |
| SAS046 | S  | Hypothetical protein                                                  |
| SAS048 | S  | Hypothetical protein                                                  |
| SAS050 | S  | Hypothetical protein                                                  |
| SAS051 | S  | Hypothetical protein                                                  |

|        |   |                      |
|--------|---|----------------------|
| SAS053 | S | Hypothetical protein |
| SAS058 | S | Hypothetical protein |
| SAS059 | S | Hypothetical protein |
| SAS060 | S | Hypothetical protein |
| SAS061 | S | Hypothetical protein |
| SAS062 | S | Hypothetical protein |
| SAS063 | S | Hypothetical protein |
| SAS064 | S | Hypothetical protein |
| SAS071 | S | Hypothetical protein |
| SAS073 | S | Hypothetical protein |
| SAS075 | S | Hypothetical protein |
| SAS076 | - | Hypothetical protein |
| SAS080 | S | Hypothetical protein |
| SAS082 | S | Hypothetical protein |
| SAS083 | S | Hypothetical protein |
| SAS086 | S | Hypothetical protein |
| SAS087 | S | Hypothetical protein |
| SAS089 | S | Hypothetical protein |
| SAS090 | S | Hypothetical protein |
| SAS092 | S | Hypothetical protein |

---

\* Classification based on COGs category described in Fig. 1.
