# Supplementary material
Source: PubMed Central journal article supplement (PMC1201578)
Supplement: pnas_0502950102_7.pdf [file pnas_0502950102_7.pdf]

**Table 5.** Nonorthologous ORFs in *Staphylococcus epidermidis* ATCC 12228

| ORF ID                    | COG* | Product                                                               |
|---------------------------|------|-----------------------------------------------------------------------|
| <b>Transport systems</b>  |      |                                                                       |
| SE1106                    | -    | ABC transporter (membrane spanning protein)                           |
| SE0137                    | D    | Capsular polysaccharide synthesis enzyme Cap5B                        |
| SE0105                    | E    | Arginine/ornithine antiporter                                         |
| SE0222                    | E    | Glycine betaine/carnitine/choline ABC transporter (ATP-binding) opuCA |
| SE0223                    | E    | OpuCB protein                                                         |
| SE0225                    | E    | OpuCD protein                                                         |
| SE2004                    | E    | Amino acid ABC transporter-like protein                               |
| SE2015                    | E    | OpuCD protein                                                         |
| SE2018                    | E    | Glycine betaine/carnitine/choline ABC transporter (ATP-binding) opuCA |
| SE2130                    | E    | D-serine/D-alanine/glycine transporter                                |
| SE2101                    | G    | PTS enzyme II glucose-specific factor IIABC component                 |
| SE0123                    | GEPR | Sugar transporter                                                     |
| SE0196                    | GEPR | Transmembrane efflux pump protein                                     |
| SE0241                    | GEPR | Multidrug resistance protein                                          |
| SE1757                    | GEPR | Multidrug resistance protein                                          |
| SE2238                    | GEPR | TcaB protein                                                          |
| SE2396                    | GEPR | Transporter                                                           |
| SE0146                    | M    | Conserved hypothetical protein                                        |
| SE0259                    | M    | Glycine betaine transporter opuD-like protein                         |
| SE2016                    | M    | Glycine betaine/carnitine/choline ABC transporter (osmoprotec) opuCC  |
| SE0062                    | P    | Copper-transporting ATPase copA                                       |
| SE0073                    | P    | Cadmium efflux system accessory protein                               |
| SE0074                    | P    | Putative divalent heavy-metal cations transporter                     |
| SE0078                    | P    | Cadmium resistance transporter, putative                              |
| SE0084                    | P    | Mercuric transport protein                                            |
| SE0126                    | P    | Copper-transporting ATPase copA                                       |
| SE0138                    | P    | Arsenical resistance operon trans-acting ArsD                         |
| SE0251                    | P    | ABC transporter, periplasmic binding component                        |
| SE0334                    | P    | Arsenic efflux pump protein                                           |
| SE0335                    | P    | Arsenic efflux pump protein                                           |
| SE0462                    | P    | Conserved hypothetical protein                                        |
| SE1515                    | P    | Putative cadmium resistance transporter                               |
| SE1955                    | P    | Copper export proteins                                                |
| SE1957                    | P    | Copper export proteins                                                |
| SE0117                    | Q    | ABC transporter (ATP-binding protein)                                 |
| SE0140                    | R    | Putative membrane protein                                             |
| SE2170                    | R    | Anaerobic dicarboxylate transport                                     |
| <b>Regulation systems</b> |      |                                                                       |
| SE1636                    | -    | AgrD protein                                                          |
| SE0107                    | E    | Arginine repressor                                                    |
| SE0081                    | K    | Conserved hypothetical protein                                        |
| SE0093                    | K    | Transcriptional regulator tetR-family                                 |
| SE0104                    | K    | Transcription regulator Crp/Fnr family protein                        |
| SE0139                    | K    | Arsenical resistance operon repressor-like protein                    |
| SE1642                    | K    | Sucrose operon repressor                                              |
| SE1871                    | K    | Transcription regulator                                               |
| SE1891                    | K    | Transcription regulator RpiR family                                   |
| SE2410                    | K    | Transcriptional regulator AcrR family                                 |
| SE1102                    | KG   | Lactose phosphotransferase system repressor                           |
| SE0121                    | T    | Two-component sensor histidine kinase                                 |
| SE0120                    | TK   | Response regulator                                                    |
| <b>Mobile elements</b>    |      |                                                                       |
| SE0042                    | -    | Abortive phage resistance protein                                     |
| SE0045                    | -    | Truncated transposase                                                 |
| SE0063                    | -    | Truncated transposase                                                 |
| SE0064                    | -    | Truncated transposase                                                 |
| SE0065                    | -    | Truncated transposase                                                 |
| SE0066                    | -    | Truncated transposase                                                 |
| SE0067                    | -    | Truncated transposase                                                 |
| SE0100                    | -    | Transposase                                                           |
| SE0257                    | -    | Truncated transposase                                                 |
| SE0355                    | -    | Truncated transposase                                                 |
| SE0483                    | -    | Truncated transposase                                                 |
| SE0495                    | -    | Truncated transposase                                                 |
| SE0568                    | -    | Conserved hypothetical protein                                        |
| SE0590                    | -    | Truncated transposase                                                 |
| SE0651                    | -    | Truncated transposase                                                 |
| SE0652                    | -    | Truncated transposase                                                 |
| SE0668                    | -    | Truncated transposase                                                 |
| SE0702                    | -    | Transposase                                                           |
| SE0711                    | -    | IS605/IS200-like transposase                                          |
| SE0808                    | -    | Truncated transposase                                                 |
| SE0809                    | -    | Truncated transposase                                                 |
| SE0989                    | -    | Phage protein                                                         |
| SE0990                    | -    | Conserved hypothetical protein                                        |

|        |   |                                             |
|--------|---|---------------------------------------------|
| SE1005 | - | Truncated transposase                       |
| SE1044 | - | Truncated transposase                       |
| SE1219 | - | Truncated transposase                       |
| SE1319 | - | Truncated transposase                       |
| SE1363 | - | Truncated transposase                       |
| SE1386 | - | Truncated transposase                       |
| SE1454 | - | Truncated transposase                       |
| SE1470 | - | Similar to phage phi PVL amidase            |
| SE1475 | - | Abortive phage resistance protein           |
| SE1539 | - | Truncated transposase                       |
| SE1839 | - | Truncated transposase                       |
| SE1899 | - | Truncated transposase                       |
| SE1982 | - | Truncated transposase                       |
| SE1990 | - | Truncated transposase                       |
| SE2078 | - | Truncated transposase                       |
| SE2134 | - | Truncated transposase                       |
| SE2153 | - | Truncated transposase                       |
| SE2203 | - | Truncated transposase                       |
| SE2235 | - | Truncated transposase                       |
| SE2338 | - | Truncated transposase                       |
| SE0051 | L | Conserved hypothetical protein              |
| SE0056 | L | Cassette chromosome recombinase B           |
| SE0057 | L | Cassette chromosome recombinase A           |
| SE0059 | L | Cassette chromosome recombinase A           |
| SE0071 | L | Transposase for IS-like element             |
| SE0076 | L | Truncated transposase                       |
| SE0079 | L | Transposase for IS-like element             |
| SE0101 | L | Transposase                                 |
| SE0111 | L | Putative replication initiation protein Rep |
| SE0282 | L | Transposase                                 |
| SE0628 | L | Conserved hypothetical protein              |
| SE0667 | L | Transposase                                 |
| SE0675 | L | Conserved hypothetical protein              |
| SE0687 | L | Conserved hypothetical protein              |
| SE0710 | L | Recombinase Sin                             |
| SE0988 | L | Integrase XerD family protein               |
| SE1013 | L | IS605/IS200-like transposase                |
| SE1292 | L | IS605/IS200-like transposase                |
| SE1453 | L | Conserved hypothetical protein              |
| SE1455 | L | Transposase                                 |
| SE1467 | L | Integrase                                   |
| SE1472 | L | Integrase                                   |
| SE1487 | L | Replication-associated protein              |
| SE1509 | L | Integrase                                   |
| SE1721 | L | Transposase                                 |
| SE1900 | L | Transposase                                 |
| SE1983 | L | Transposase                                 |
| SE2079 | L | Transposase                                 |
| SE2208 | L | IS605/IS200-like transposase                |
| SE2260 | L | Conserved hypothetical protein              |

#### Virulence factors and antibiotics resistance

|        |   |                                              |
|--------|---|----------------------------------------------|
| SE0722 | - | Serine protease HtrA                         |
| SE0828 | - | Lipoprotein VsaC                             |
| SE0848 | - | Phenol soluble modulins $\beta$ 1/ $\beta$ 2 |
| SE0849 | - | Phenol soluble modulins $\beta$ 1/ $\beta$ 2 |
| SE1634 | - | $\delta$ -Haemolysin                         |
| SE1632 | K | Ser-Asp rich fibrinogen-binding protein      |
| SE0185 | R | Glycerol ester hydrolase                     |
| SE0245 | R | Triacylglycerol lipase precursor             |
| SE2403 | R | Glycerol ester hydrolase                     |

#### Other function assigned

|        |    |                                                                       |
|--------|----|-----------------------------------------------------------------------|
| SE0086 | -  | Organomercurial lyase                                                 |
| SE0709 | -  | Alcohol dehydrogenase                                                 |
| SE1104 | -  | Phosphohydrolases, lcc family                                         |
| SE2057 | -  | Thiamine phosphate synthase                                           |
| SE2394 | -  | Poly (glycerol-phosphate) $\alpha$ -glucosyltransferase               |
| SE0077 | C  | Dihydrolipoamide dehydrogenase component of pyruvate dehydrogenase E3 |
| SE0080 | C  | Regulatory protein                                                    |
| SE0085 | C  | Dihydrolipoamide dehydrogenase                                        |
| SE0195 | C  | Putative NADH-dependent flavin oxidoreductase                         |
| SE0235 | C  | Glycerol dehydrogenase                                                |
| SE0253 | C  | Dihydrolipoamide dehydrogenase                                        |
| SE0254 | C  | Branched-chain $\alpha$ -keto acid dehydrogenase E1                   |
| SE0255 | C  | Branched-chain $\alpha$ -keto acid dehydrogenase E1                   |
| SE0256 | C  | Dihydrolipoamide S-acetyltransferase                                  |
| SE1914 | C  | L-ribulokinase                                                        |
| SE2145 | C  | L-lactate dehydrogenase                                               |
| SE0096 | CR | Alginate lyase                                                        |

|         |    |                                                                   |
|---------|----|-------------------------------------------------------------------|
| SE0102  | E  | Putative carbamate kinase                                         |
| SE0103  | E  | Ornithine carbamoyltransferase                                    |
| SE0106  | E  | Arginine deiminase                                                |
| SE0112  | E  | Pyridoxal-deC                                                     |
| SE0216  | E  | Succinyl-diaminopimelate desuccinylase                            |
| SE1209  | E  | Ornithine aminotransferase                                        |
| SE1656  | E  | Acetolactate synthase small subunit                               |
| SE2035  | E  | Succinyl-diaminopimelate desuccinylase                            |
| SE2058  | E  | Glycine oxidase                                                   |
| SE2220  | E  | Succinyl-diaminopimelate desuccinylase                            |
| SE0320  | ER | Xylitol dehydrogenase                                             |
| SE2019  | ER | Sorbitol dehydrogenase                                            |
| SE2098  | ER | Sorbitol dehydrogenase-like protein                               |
| SE0755  | F  | Inosine-uridine preferring nucleoside hydrolase                   |
| SE1736  | F  | Deoxyribose-phosphate aldolase                                    |
| SE2060  | F  | Thiamine biosynthesis protein                                     |
| SE0703  | G  | Glucose-6-phosphate 1-dehydrogenase                               |
| SE0705  | G  | Glucose-6-phosphate 1-dehydrogenase                               |
| SE1161  | G  | Glycerol-3-phosphate dehydrogenase                                |
| SE1781  | G  | 6-Phospho- $\beta$ -galactosidase                                 |
| SE0181  | H  | 8-Amino-7-oxononanoate synthase                                   |
| SE0194  | H  | Thiamine biosynthesis lipoprotein                                 |
| SE1976  | H  | Uroporphyrin-III C-methyltransferase                              |
| SE2061  | H  | Molybdopterin biosynthesis protein moeB                           |
| SE2178  | H  | Uroporphyrin-III C-methyltransferase                              |
| SE0997  | I  | Cardiolipin synthetase-like protein                               |
| SE0026  | J  | Spermidine acetyltransferase                                      |
| SE0046  | J  | Spermidine acetyltransferase                                      |
| SE0946  | J  | Ribosome-binding factor A                                         |
| SE1164  | J  | 30S ribosomal protein S1                                          |
| SE1813  | J  | 50S ribosomal protein L14                                         |
| SE0043  | L  | Type I restriction enzyme R protein                               |
| SE0044  | L  | Probable specificity determinant HsdS                             |
| SE0091  | L  | Type I restriction enzyme R protein                               |
| SE0108  | L  | Type I restriction-modification system endonuclease               |
| SE0115  | L  | Coenzyme PQQ synthesis protein E                                  |
| SE0706  | L  | UvrA-like protein                                                 |
| SE1482  | L  | DNA topoisomerase III topB                                        |
| SE0025  | M  | Teichoic acid biosynthesis protein F                              |
| SE0168  | M  | Galactosamine-containing minor teichoic acid biosynthesis protein |
| SE0170  | M  | Galactosamine-containing minor teichoic acid biosynthesis protein |
| SE1480  | M  | Sortase                                                           |
| SE2041  | M  | Poly (glycerol-phosphate) $\alpha$ -glucosyltransferase           |
| SE2199  | M  | Teichoic acid biosynthesis protein F                              |
| SE2318  | M  | Poly (glycerol-phosphate) $\alpha$ -glucosyltransferase           |
| SE2393  | M  | Poly (glycerol-phosphate) $\alpha$ -glucosyltransferase           |
| SE0072  | N  | Lipoprotein signal peptidase                                      |
| SE2397  | N  | Type-1 signal peptidase 1B                                        |
| SE0127  | Q  | Putative multicopper oxidases                                     |
| SE2356  | Q  | 2-Oxo-hepta-3-ene-1,7-dioate hydratase                            |
| SE0197  | QR | Acetoin(diacetyl)reductase                                        |
| SE0157  | R  | Malate:quinone oxidoreductase                                     |
| SE0226  | R  | Tributyryn esterase                                               |
| SE0266  | R  | Malate:quinone oxidoreductase                                     |
| SE2154  | R  | Coenzyme A disulfide reductase                                    |
| SE2158  | R  | Malate:quinone oxidoreductase                                     |
| Unknown |    |                                                                   |
| SE0017  | S  | Hypothetical protein                                              |
| SE0024  | S  | Hypothetical protein                                              |
| SE0027  | S  | Conserved hypothetical protein                                    |
| SE0028  | S  | Conserved hypothetical protein                                    |
| SE0029  | S  | Conserved hypothetical protein                                    |
| SE0031  | S  | Conserved hypothetical protein                                    |
| SE0032  | S  | Conserved hypothetical protein                                    |
| SE0033  | S  | Conserved hypothetical protein                                    |
| SE0041  | -  | Abi- $\alpha$ protein                                             |
| SE0047  | S  | Hypothetical protein                                              |
| SE0049  | S  | Hypothetical protein                                              |
| SE0050  | S  | Conserved hypothetical protein                                    |
| SE0052  | S  | Conserved hypothetical protein                                    |
| SE0053  | S  | Conserved hypothetical protein                                    |
| SE0054  | -  | Conserved hypothetical protein                                    |
| SE0055  | S  | Conserved hypothetical protein                                    |
| SE0058  | -  | Conserved hypothetical protein                                    |
| SE0060  | S  | Hypothetical protein                                              |
| SE0061  | S  | Hypothetical protein                                              |
| SE0068  | S  | Hypothetical protein                                              |
| SE0070  | S  | Hypothetical protein                                              |
| SE0082  | -  | Conserved hypothetical protein                                    |

|        |      |                                |
|--------|------|--------------------------------|
| SE0083 | -    | Conserved hypothetical protein |
| SE0087 | -    | Conserved hypothetical protein |
| SE0088 | S    | Hypothetical protein           |
| SE0089 | S    | Hypothetical protein           |
| SE0092 | S    | Hypothetical protein           |
| SE0097 | S    | Hypothetical protein           |
| SE0098 | -    | Conserved hypothetical protein |
| SE0099 | S    | Hypothetical protein           |
| SE0109 | S    | Hypothetical protein           |
| SE0113 | S    | Hypothetical protein           |
| SE0114 | -    | Conserved hypothetical protein |
| SE0116 | S    | Hypothetical protein           |
| SE0118 | S    | Hypothetical protein           |
| SE0119 | S    | Hypothetical protein           |
| SE0122 | S    | Hypothetical protein           |
| SE0124 | -    | Immunodominant antigen B       |
| SE0125 | S    | Hypothetical protein           |
| SE0128 | -    | Conserved hypothetical protein |
| SE0131 | -    | Conserved hypothetical protein |
| SE0141 | S    | Hypothetical protein           |
| SE0143 | S    | Hypothetical protein           |
| SE0144 | S    | Conserved hypothetical protein |
| SE0148 | S    | Hypothetical protein           |
| SE0149 | S    | Hypothetical protein           |
| SE0150 | S    | Hypothetical protein           |
| SE0151 | S    | Hypothetical protein           |
| SE0153 | -    | Conserved hypothetical protein |
| SE0154 | S    | Hypothetical protein           |
| SE0155 | S    | Hypothetical protein           |
| SE0158 | S    | Hypothetical protein           |
| SE0159 | S    | Hypothetical protein           |
| SE0169 | S    | Hypothetical protein           |
| SE0171 | S    | Hypothetical protein           |
| SE0172 | S    | Hypothetical protein           |
| SE0173 | S    | Hypothetical protein           |
| SE0174 | S    | Hypothetical protein           |
| SE0176 | S    | Hypothetical protein           |
| SE0177 | S    | Hypothetical protein           |
| SE0178 | S    | Hypothetical protein           |
| SE0186 | -    | Conserved hypothetical protein |
| SE0187 | -    | Conserved hypothetical protein |
| SE0190 | S    | Hypothetical protein           |
| SE0192 | S    | Hypothetical protein           |
| SE0200 | S    | Hypothetical protein           |
| SE0204 | S    | Hypothetical protein           |
| SE0207 | S    | Hypothetical protein           |
| SE0230 | S    | Hypothetical protein           |
| SE0233 | S    | Hypothetical protein           |
| SE0239 | GEPR | Multidrug resistance protein   |
| SE0240 | S    | Hypothetical protein           |
| SE0246 | S    | Hypothetical protein           |
| SE0248 | R    | Conserved hypothetical protein |
| SE0260 | S    | Hypothetical protein           |
| SE0265 | S    | Hypothetical protein           |
| SE0268 | -    | Conserved hypothetical protein |
| SE0279 | S    | Hypothetical protein           |
| SE0280 | S    | Hypothetical protein           |
| SE0302 | S    | Hypothetical protein           |
| SE0316 | S    | Hypothetical protein           |
| SE0328 | S    | Hypothetical protein           |
| SE0333 | S    | Hypothetical protein           |
| SE0336 | S    | Hypothetical protein           |
| SE0345 | S    | Hypothetical protein           |
| SE0377 | -    | Conserved hypothetical protein |
| SE0378 | S    | Hypothetical protein           |
| SE0391 | -    | Conserved hypothetical protein |
| SE0393 | S    | Hypothetical protein           |
| SE0394 | S    | Hypothetical protein           |
| SE0416 | S    | Hypothetical protein           |
| SE0417 | S    | Hypothetical protein           |
| SE0453 | L    | Conserved hypothetical protein |
| SE0458 | S    | Hypothetical protein           |
| SE0469 | S    | Hypothetical protein           |
| SE0476 | S    | Hypothetical protein           |
| SE0482 | S    | Hypothetical protein           |
| SE0496 | S    | Hypothetical protein           |
| SE0497 | S    | Hypothetical protein           |
| SE0498 | S    | Hypothetical protein           |
| SE0508 | S    | Hypothetical protein           |
| SE0540 | S    | Hypothetical protein           |

|        |   |                                     |
|--------|---|-------------------------------------|
| SE0552 | S | Hypothetical protein                |
| SE0555 | S | Hypothetical protein                |
| SE0567 | S | Hypothetical protein                |
| SE0570 | - | Conserved hypothetical protein      |
| SE0572 | S | Hypothetical protein                |
| SE0574 | S | Hypothetical protein                |
| SE0575 | - | Conserved hypothetical protein      |
| SE0582 | S | Hypothetical protein                |
| SE0589 | S | Hypothetical protein                |
| SE0597 | S | Hypothetical protein                |
| SE0603 | S | Hypothetical protein                |
| SE0611 | S | Hypothetical protein                |
| SE0612 | S | Hypothetical protein                |
| SE0661 | S | Hypothetical protein                |
| SE0671 | - | Conserved hypothetical protein      |
| SE0704 | S | Hypothetical protein                |
| SE0708 | S | Hypothetical protein                |
| SE0719 | - | Conserved hypothetical protein      |
| SE0730 | S | Hypothetical protein                |
| SE0732 | - | Truncated Pre protein               |
| SE0733 | S | Hypothetical protein                |
| SE0734 | - | Conserved hypothetical protein      |
| SE0735 | - | Conserved hypothetical protein      |
| SE0737 | S | Hypothetical protein                |
| SE0739 | S | Hypothetical protein                |
| SE0742 | S | Hypothetical protein                |
| SE0820 | S | Hypothetical protein                |
| SE0829 | S | Hypothetical protein                |
| SE0846 | S | Hypothetical protein                |
| SE0847 | S | Hypothetical protein                |
| SE0870 | - | Secretory antigen SsaA              |
| SE0874 | S | Hypothetical protein                |
| SE0882 | - | Conserved hypothetical protein      |
| SE0919 | - | Conserved hypothetical protein      |
| SE0920 | S | Hypothetical protein                |
| SE0961 | - | Competence-damage inducible protein |
| SE0992 | - | Conserved hypothetical protein      |
| SE0993 | S | Hypothetical protein                |
| SE0994 | - | Conserved hypothetical protein      |
| SE1001 | - | Conserved hypothetical protein      |
| SE1021 | S | Hypothetical protein                |
| SE1056 | S | Hypothetical protein                |
| SE1084 | S | Hypothetical protein                |
| SE1085 | S | Hypothetical protein                |
| SE1095 | S | Hypothetical protein                |
| SE1098 | S | Hypothetical protein                |
| SE1101 | S | Hypothetical protein                |
| SE1103 | Q | Conserved hypothetical protein      |
| SE1112 | S | Hypothetical protein                |
| SE1124 | S | Conserved hypothetical protein      |
| SE1129 | - | Conserved hypothetical protein      |
| SE1149 | S | Hypothetical protein                |
| SE1173 | S | Hypothetical protein                |
| SE1189 | S | Hypothetical protein                |
| SE1223 | S | Hypothetical protein                |
| SE1239 | S | Hypothetical protein                |
| SE1316 | S | Hypothetical protein                |
| SE1362 | S | Hypothetical protein                |
| SE1364 | S | Hypothetical protein                |
| SE1395 | S | Hypothetical protein                |
| SE1399 | S | Hypothetical protein                |
| SE1420 | S | Hypothetical protein                |
| SE1445 | S | Hypothetical protein                |
| SE1465 | S | Hypothetical protein                |
| SE1466 | - | Conserved hypothetical protein      |
| SE1468 | S | Hypothetical protein                |
| SE1469 | S | Hypothetical protein                |
| SE1471 | S | Hypothetical protein                |
| SE1473 | S | Hypothetical protein                |
| SE1474 | - | Conserved hypothetical protein      |
| SE1476 | S | Hypothetical protein                |
| SE1477 | - | Conserved hypothetical protein      |
| SE1478 | - | LtrC-like protein                   |
| SE1479 | S | Hypothetical protein                |
| SE1481 | - | Conserved hypothetical protein      |
| SE1483 | - | Conserved hypothetical protein      |
| SE1484 | S | Hypothetical protein                |
| SE1485 | S | Hypothetical protein                |
| SE1486 | S | Hypothetical protein                |
| SE1488 | S | Hypothetical protein                |

|        |   |                                     |
|--------|---|-------------------------------------|
| SE1489 | - | Secretory antigen SsaA-like protein |
| SE1490 | - | Putative ATPase TraE                |
| SE1491 | - | Conserved hypothetical protein      |
| SE1492 | S | Hypothetical protein                |
| SE1493 | S | Hypothetical protein                |
| SE1494 | - | Conserved hypothetical protein      |
| SE1495 | - | Conserved hypothetical protein      |
| SE1496 | S | Hypothetical protein                |
| SE1497 | L | Hypothetical protein                |
| SE1498 | - | Conserved hypothetical protein      |
| SE1499 | S | Hypothetical protein                |
| SE1500 | S | Hypothetical protein                |
| SE1501 | S | Hypothetical protein                |
| SE1502 | S | Hypothetical protein                |
| SE1503 | S | Hypothetical protein                |
| SE1504 | S | Hypothetical protein                |
| SE1506 | S | Hypothetical protein                |
| SE1507 | S | Hypothetical protein                |
| SE1508 | S | Hypothetical protein                |
| SE1522 | S | Hypothetical protein                |
| SE1534 | S | Conserved hypothetical protein      |
| SE1536 | - | Conserved hypothetical protein      |
| SE1544 | S | Hypothetical protein                |
| SE1556 | S | Hypothetical protein                |
| SE1575 | - | Immunodominant antigen B            |
| SE1605 | - | Conserved hypothetical protein      |
| SE1610 | S | Hypothetical protein                |
| SE1614 | S | Conserved hypothetical protein      |
| SE1628 | S | Hypothetical protein                |
| SE1641 | S | Hypothetical protein                |
| SE1663 | S | Hypothetical protein                |
| SE1664 | S | Hypothetical protein                |
| SE1665 | S | Hypothetical protein                |
| SE1683 | S | Hypothetical protein                |
| SE1714 | S | Hypothetical protein                |
| SE1741 | S | Hypothetical protein                |
| SE1744 | - | Conserved hypothetical protein      |
| SE1755 | S | Hypothetical protein                |
| SE1773 | - | Alkaline shock protein 23           |
| SE1854 | - | FDHD protein                        |
| SE1859 | S | Hypothetical protein                |
| SE1872 | - | SsaA protein                        |
| SE1886 | - | Protein of pXO2-46                  |
| SE1887 | - | Conserved hypothetical protein      |
| SE1894 | - | Conserved hypothetical protein      |
| SE1909 | S | Hypothetical protein                |
| SE1910 | S | Hypothetical protein                |
| SE1915 | S | Hypothetical protein                |
| SE1916 | S | Hypothetical protein                |
| SE1918 | - | Conserved hypothetical protein      |
| SE1921 | - | Conserved hypothetical protein      |
| SE1922 | S | Hypothetical protein                |
| SE1931 | S | Hypothetical protein                |
| SE1953 | - | Conserved hypothetical protein      |
| SE1954 | - | Conserved hypothetical protein      |
| SE1956 | S | Hypothetical protein                |
| SE1980 | S | Hypothetical protein                |
| SE2006 | S | Hypothetical protein                |
| SE2008 | N | Lipoprotein precursor               |
| SE2026 | - | Conserved hypothetical protein      |
| SE2031 | S | Hypothetical protein                |
| SE2037 | - | Conserved hypothetical protein      |
| SE2049 | S | Hypothetical protein                |
| SE2050 | - | Truncated hypothetical protein      |
| SE2051 | I | Unknown                             |
| SE2059 | - | Conserved hypothetical protein      |
| SE2065 | S | Hypothetical protein                |
| SE2072 | S | Hypothetical protein                |
| SE2083 | S | Hypothetical protein                |
| SE2084 | S | Hypothetical protein                |
| SE2100 | S | Hypothetical protein                |
| SE2123 | S | Hypothetical protein                |
| SE2124 | - | SsaA protein                        |
| SE2127 | S | Hypothetical protein                |
| SE2128 | S | Conserved hypothetical protein      |
| SE2136 | - | TcaA protein                        |
| SE2137 | S | Hypothetical protein                |
| SE2138 | S | Hypothetical protein                |
| SE2149 | S | Hypothetical protein                |
| SE2151 | - | Conserved hypothetical protein      |

|        |    |                                |
|--------|----|--------------------------------|
| SE2152 | S  | Hypothetical protein           |
| SE2155 | S  | Hypothetical protein           |
| SE2169 | S  | Hypothetical protein           |
| SE2173 | S  | Hypothetical protein           |
| SE2182 | S  | Hypothetical protein           |
| SE2186 | S  | Hypothetical protein           |
| SE2190 | S  | Hypothetical protein           |
| SE2191 | -  | Conserved hypothetical protein |
| SE2196 | -  | Conserved hypothetical protein |
| SE2198 | MG | Conserved hypothetical protein |
| SE2200 | -  | Conserved hypothetical protein |
| SE2202 | S  | Hypothetical protein           |
| SE2204 | L  | Conserved hypothetical protein |
| SE2205 | S  | Hypothetical protein           |
| SE2206 | S  | Hypothetical protein           |
| SE2211 | S  | Hypothetical protein           |
| SE2223 | -  | Conserved hypothetical protein |
| SE2224 | -  | Conserved hypothetical protein |
| SE2226 | S  | Hypothetical protein           |
| SE2234 | S  | Hypothetical protein           |
| SE2237 | -  | Conserved hypothetical protein |
| SE2250 | S  | Hypothetical protein           |
| SE2251 | S  | Hypothetical protein           |
| SE2252 | S  | Hypothetical protein           |
| SE2264 | -  | Conserved hypothetical protein |
| SE2265 | S  | Hypothetical protein           |
| SE2304 | S  | Hypothetical protein           |
| SE2325 | -  | Conserved hypothetical protein |
| SE2327 | S  | Hypothetical protein           |
| SE2331 | S  | Hypothetical protein           |
| SE2334 | -  | Conserved hypothetical protein |
| SE2336 | S  | Hypothetical protein           |
| SE2340 | S  | Hypothetical protein           |
| SE2341 | S  | Conserved hypothetical protein |
| SE2342 | S  | Conserved hypothetical protein |
| SE2343 | S  | Hypothetical protein           |
| SE2344 | S  | Hypothetical protein           |
| SE2359 | S  | Hypothetical protein           |
| SE2361 | S  | Hypothetical protein           |
| SE2363 | S  | Hypothetical protein           |
| SE2366 | S  | Hypothetical protein           |
| SE2368 | S  | Hypothetical protein           |
| SE2385 | S  | Hypothetical protein           |
| SE2398 | S  | Hypothetical protein           |
| SE2399 | S  | Hypothetical protein           |
| SE2404 | S  | Hypothetical protein           |
| SE2407 | Q  | Conserved hypothetical protein |
| SE2413 | S  | Hypothetical protein           |

---

\* Classification based on COGs category described in Fig. 1.
