# Supplementary material
Source: PubMed Central journal article supplement (PMC1201578)
Supplement: pnas_0502950102_8.pdf [file pnas_0502950102_8.pdf]

**Table 6.** Cluster of NRAMP family orthologs classified by phylogenetic tree

| Classification | source                                 | Protein ID     |
|----------------|----------------------------------------|----------------|
| Metazoa*       |                                        |                |
| Metazoa        | <i>Homo sapiens</i>                    | AAH02592.1     |
| Metazoa        | <i>Homo sapiens</i>                    | CAD38517.1     |
| Metazoa        | <i>Macaca fascicularis</i>             | AAF71822.1     |
| Metazoa        | <i>Homo sapiens</i>                    | II57022        |
| Metazoa        | <i>Homo sapiens</i>                    | AAC21461.1     |
| Metazoa        | <i>Macaca fascicularis</i>             | AAF71821.1     |
| Metazoa        | <i>Homo sapiens</i>                    | BAA34374.1     |
| Metazoa        | <i>Mus musculus</i>                    | AAH19137.1     |
| Metazoa        | <i>Mus musculus</i>                    | NP_032758.1    |
| Metazoa        | <i>Rattus norvegicus</i>               | O54902         |
| Metazoa        | <i>Mus musculus</i>                    | BAC33960.1     |
| Metazoa        | <i>Mus musculus</i>                    | AAC24496.1     |
| Metazoa        | <i>Mus musculus</i>                    | BAC38930.1     |
| Metazoa        | <i>Rattus norvegicus</i>               | NP_037305.1    |
| Metazoa        | <i>Ictalurus punctatus</i>             | AAM73761.1     |
| Metazoa        | <i>Oncorhynchus kisutch</i>            | AAO63772.1     |
| Metazoa        | <i>Oncorhynchus mykiss</i>             | AAD20721.1     |
| Metazoa        | <i>Oncorhynchus mykiss</i>             | AAD20725.1     |
| Metazoa        | <i>Oncorhynchus mykiss</i>             | AAD20722.1     |
| Metazoa        | <i>Oncorhynchus mykiss</i>             | AAD20726.1     |
| Metazoa        | <i>Danio rerio</i>                     | NP_997739.1    |
| Metazoa        | <i>Cyprinus carpio</i>                 | CAB60196.1     |
| Metazoa        | <i>Pimephales promelas</i>             | AAF01778.2     |
| Metazoa        | <i>Takifugu rubripes</i>               | CAD43053.1     |
| Metazoa        | <i>Morone saxatilis</i>                | AAG31225.2     |
| Metazoa        | <i>Pagrus major</i>                    | AAR83912.1     |
| Metazoa        | <i>Tetraodon nigroviridis</i>          | CAF96535.1     |
| Metazoa        | <i>Takifugu rubripes</i>               | CAD43052.1     |
| Metazoa        | <i>Homo sapiens</i>                    | JC4095         |
| Metazoa        | <i>Homo sapiens</i>                    | CAA57541.1     |
| Metazoa        | <i>Homo sapiens</i>                    | P49279         |
| Metazoa        | <i>Homo sapiens</i>                    | NP_000569.2    |
| Metazoa        | <i>Homo sapiens</i>                    | BAA07370.1     |
| Metazoa        | <i>Homo sapiens</i>                    | AAH71165.1     |
| Metazoa        | <i>Equus caballus</i>                  | AAK40103.1     |
| Metazoa        | <i>Bos taurus</i>                      | NP_777077.1    |
| Metazoa        | <i>Bison bison</i> (American bison)    | Q95102         |
| Metazoa        | <i>Bubalus bubalis</i> (water buffalo) | Q27946         |
| Metazoa        | <i>Cervus elaphus</i>                  | P56436         |
| Metazoa        | <i>Ovis aries</i>                      | NP_001009345.1 |
| Metazoa        | <i>Ovis aries</i>                      | P49280         |
| Metazoa        | <i>Sus scrofa</i>                      | NP_998986.1    |
| Metazoa        | <i>Sus scrofa domestica</i>            | O77741         |
| Metazoa        | <i>Canis familiaris</i>                | AAD37483.2     |
| Metazoa        | <i>Canis familiaris</i>                | XP_536068.1    |
| Metazoa        | <i>Mus musculus</i>                    | NP_038640.1    |
| Metazoa        | <i>Gallus gallus</i>                   | P51027         |
| Metazoa        | <i>Xenopus laevis</i>                  | AAH82695.1     |
| Metazoa        | <i>Drosophila melanogaster</i>         | NP_732584.1    |
| Metazoa        | <i>Drosophila melanogaster</i>         | AAV36881.1     |
| Metazoa        | <i>Drosophila melanogaster</i>         | NP_996251.1    |
| Metazoa        | <i>Drosophila simulans</i>             | AAQ64743.1     |
| Metazoa        | <i>Drosophila pseudoobscura</i>        | EAL29216.1     |
| Metazoa        | <i>Drosophila yakuba</i>               | AAQ65051.1     |
| Metazoa        | <i>Anopheles gambiae</i>               | XP_315254.1    |
| Metazoa        | <i>Anopheles gambiae</i> str. PEST     | EAA10641.2     |
| Metazoa        | <i>Schistosoma mansoni</i>             | AAS99648.1     |
| Metazoa        | <i>Schistosoma mansoni</i>             | AAS99649.1     |
| Metazoa        | <i>Caenorhabditis elegans</i>          | NP_509132.1    |

|                |                                               |             |
|----------------|-----------------------------------------------|-------------|
| Metazoa        | <i>Caenorhabditis elegans</i>                 | AAU05559.1  |
| Metazoa        | <i>Caenorhabditis briggsae</i>                | CAE65780.1  |
| Metazoa        | <i>Caenorhabditis elegans</i>                 | NP_509131.1 |
| Metazoa        | <i>Caenorhabditis briggsae</i>                | CAE65779.1  |
| Metazoa        | <i>Caenorhabditis elegans</i>                 | NP_500235.2 |
| Metazoa        | <i>Caenorhabditis elegans</i>                 | AAL27264.2  |
| Metazoa        | <i>Caenorhabditis briggsae</i>                | CAE68215.1  |
| Viridiplantae* |                                               |             |
| Viridiplantae  | <i>Arabidopsis thaliana</i> imported          | AAM14929.1  |
| Viridiplantae  | <i>Arabidopsis thaliana</i>                   | AAF13278.1  |
| Viridiplantae  | <i>Glycine max</i>                            | AAO39834.1  |
| Viridiplantae  | <i>Arabidopsis thaliana</i> imported          | AAM26695.1  |
| Viridiplantae  | <i>Arabidopsis thaliana</i>                   | AAD41078.1  |
| Viridiplantae  | <i>Lycopersicon esculentum</i>                | AAP21819.1  |
| Viridiplantae  | <i>Arabidopsis thaliana</i>                   | AAM97132.1  |
| Viridiplantae  | <i>Arabidopsis thaliana</i>                   | AAF13279.1  |
| Viridiplantae  | <i>Thlaspi japonicum</i>                      | BAC80141.1  |
| Viridiplantae  | <i>Oryza sativa</i>                           | AAB61961.1  |
| Viridiplantae  | <i>Oryza sativa</i> (japonica cultivar-group) | XP_470592.1 |
| Viridiplantae  | <i>Hordeum vulgare</i> subsp. <i>vulgare</i>  | CAD55951.1  |
| Viridiplantae  | <i>Arabidopsis thaliana</i>                   | CAB78881.1  |
| Mycetozoa      | <i>Dictyostelium discoideum</i>               | AAO52395.1  |
| Alveolata      | <i>Perkinsus marinus</i>                      | AAQ94879.1  |
| Viridiplantae  | <i>Arabidopsis thaliana</i>                   | CAC28123.1  |
| Viridiplantae  | <i>Arabidopsis thaliana</i>                   | AAW28555.1  |
| Viridiplantae  | <i>Arabidopsis thaliana</i> imported          | AAF18493.1  |
| Viridiplantae  | <i>Arabidopsis thaliana</i>                   | AAM63430.1  |
| Viridiplantae  | <i>Arabidopsis thaliana</i> imported          | AAF36535.1  |
| Viridiplantae  | <i>Arabidopsis thaliana</i>                   | AAD54417.1  |
| Viridiplantae  | <i>Oryza sativa</i>                           | AAC49720.1  |
| Viridiplantae  | <i>Oryza sativa</i> (japonica cultivar-group) | BAD45911.1  |
| Viridiplantae  | <i>Oryza sativa</i>                           | AAB62273.1  |
| Viridiplantae  | <i>Oryza sativa</i> (japonica cultivar-group) | XP_477312.1 |
| Viridiplantae  | <i>Oryza sativa</i> (japonica cultivar-group) | NP_911790.1 |
| Viridiplantae  | <i>Lycopersicon esculentum</i>                | AAP21818.1  |
| Viridiplantae  | <i>Malus baccata</i>                          | AAU00158.1  |
| Viridiplantae  | <i>Oryza sativa</i> (japonica cultivar-group) | XP_464012.1 |
| Viridiplantae  | <i>Oryza sativa</i> (japonica cultivar-group) | BAD73194.1  |
| Fungi*         |                                               |             |
| Fungi          | <i>Schizosaccharomyces pombe</i>              | NP_594537.1 |
| Fungi          | <i>Neurospora crassa</i>                      | XP_327816.1 |
| Fungi          | <i>Gibberella zeae</i> PH-1                   | EAA68298.1  |
| Fungi          | <i>Aspergillus nidulans</i> FGSC A4           | EAA62726.1  |
| Fungi          | <i>Eremothecium gossypii</i> ATCC 10895       | AAS51761.1  |
| Fungi          | <i>Candida glabrata</i> CBS138                | CAG58694.1  |
| Fungi          | <i>Saccharomyces cerevisiae</i>               | NP_014519.1 |
| Fungi          | <i>Kluyveromyces lactis</i> NRRL Y-1140       | XP_451165.1 |
| Fungi          | <i>Candida albicans</i> SC5314                | EAK95819.1  |
| Fungi          | <i>Candida albicans</i> SC5314                | EAL04025.1  |
| Fungi          | <i>Candida albicans</i> SC5314                | EAL04179.1  |
| Fungi          | <i>Yarrowia lipolytica</i> CLIB99             | XP_501440.1 |
| Fungi          | <i>Eremothecium gossypii</i> ATCC 10895       | AAS51264.1  |
| Fungi          | <i>Candida glabrata</i> CBS138                | XP_447729.1 |
| Fungi          | <i>Kluyveromyces lactis</i> NRRL Y-1140       | XP_453489.1 |
| Fungi          | <i>Saccharomyces cerevisiae</i>               | NP_011917.1 |
| Fungi          | <i>Candida albicans</i> SC5314                | EAL03583.1  |
| Fungi          | <i>Debaryomyces hansenii</i> CBS767           | XP_458733.1 |
| Fungi          | <i>Yarrowia lipolytica</i> CLIB99             | XP_503334.1 |
| Fungi          | <i>Eremothecium gossypii</i> ATCC 10895       | AAS53595.1  |
| Fungi          | <i>Candida glabrata</i> CBS138                | CAG57812.1  |
| Fungi          | <i>Saccharomyces cerevisiae</i>               | NP_013134.1 |

|                                     |                                                                           |                    |
|-------------------------------------|---------------------------------------------------------------------------|--------------------|
| Fungi                               | <i>Kluyveromyces lactis</i> NRRL Y-1140                                   | XP_455861.1        |
| Fungi                               | <i>Candida albicans</i> SC5314                                            | EAL00763.1         |
| Fungi                               | <i>Debaryomyces hansenii</i> CBS767                                       | XP_461918.1        |
| Fungi                               | <i>Neurospora crassa</i> imported                                         | XP_329534.1        |
| Fungi                               | <i>Ustilago maydis</i> 521                                                | EAK86669.1         |
| Fungi                               | <i>Cryptococcus neoformans</i> var. <i>neoformans</i> B-3501A             | EAL17773.1         |
| Fungi                               | <i>Cryptococcus neoformans</i> var. <i>neoformans</i> JEC21               | AAW45259.1         |
| Mycetozoa                           | <i>Dictyostelium discoideum</i>                                           | AAO53127.1         |
| Bacteria Group C SSP1685 orthologs* |                                                                           |                    |
| Bacteria                            | <i>Lactococcus lactis</i> subsp. <i>lactis</i> II1403 imported            | NP_267238.1        |
| Bacteria                            | <i>Lactococcus lactis</i> subsp. <i>lactis</i>                            | AAO67364.1         |
| Bacteria                            | <i>Enterococcus faecium</i>                                               | ZP_00285443.1      |
| Bacteria                            | <i>Lactobacillus plantarum</i> WCFS1                                      | NP_786317.1        |
| Bacteria                            | <i>Pediococcus pentosaceus</i> ATCC 25745                                 | ZP_00323093.1      |
| Bacteria                            | <i>Oenococcus oeni</i> PSU-1                                              | ZP_00320152.1      |
| Bacteria                            | <i>Streptococcus agalactiae</i> 2603V/R                                   | NP_689011.1        |
| Bacteria                            | <i>Enterococcus faecalis</i>                                              | AAO67365.1         |
| Bacteria                            | <i>Enterococcus faecalis</i> V583                                         | NP_814790.1        |
| Bacteria                            | <i>Lactobacillus johnsonii</i> NCC 533                                    | NP_965000.1        |
| Bacteria                            | <i>Streptococcus mutans</i> UA159                                         | NP_721184.1        |
| Bacteria                            | <i>Streptococcus agalactiae</i> 2603V/R; NEM316                           | NP_735216.1        |
| Bacteria                            | <i>Streptococcus thermophilus</i> CNRZ1066                                | AAV62273.1         |
| Bacteria                            | <i>Streptococcus thermophilus</i> LMG 18311                               | YP_139196.1        |
| Bacteria                            | <i>Leuconostoc mesenteroides</i> subsp. <i>mesenteroides</i> ATCC 8293    | ZP_00063650.2      |
| Bacteria                            | <i>Lactobacillus plantarum</i> WCFS1                                      | NP_784092.1        |
| Bacteria                            | <i>Lactobacillus brevis</i>                                               | Q93V04             |
| Bacteria                            | <i>Oenococcus oeni</i> PSU-1                                              | ZP_00319959.1      |
| Bacteria                            | <i>Pediococcus pentosaceus</i> ATCC 25745                                 | ZP_00323629.1      |
| Bacteria                            | <i>Enterococcus faecalis</i>                                              | AAO67366.1         |
| Bacteria                            | <i>Enterococcus faecalis</i> V583                                         | NP_815583.1        |
| Bacteria                            | <i>Staphylococcus aureus</i> subsp. <i>aureus</i> Mu50                    | NP_371629.1        |
| Bacteria                            | <i>Staphylococcus aureus</i> subsp. <i>aureus</i> COL; MSSA476; MW2; N315 | AAW37994.1         |
| Bacteria                            | <i>Staphylococcus aureus</i> subsp. <i>aureus</i> MRSA252                 | YP_040492.1        |
| Bacteria                            | <i>Staphylococcus epidermidis</i> ATCC 12228                              | NP_764358.1        |
| Bacteria                            | <i>Staphylococcus saprophyticus</i> ATCC15305                             | SSP1685; this work |
| Bacteria                            | Wigglesworthia glossinidia endosymbiont of <i>Glossina brevipalpis</i>    | NP_871121.1        |
| Bacteria                            | <i>Lactobacillus plantarum</i> WCFS1                                      | NP_784943.1        |
| Bacteria                            | <i>Agrobacterium tumefaciens</i> str. C58 imported                        | NP_354720.1        |
| Bacteria                            | <i>Agrobacterium tumefaciens</i> str. C58 imported                        | NP_532419.1        |
| Bacteria                            | <i>Mesorhizobium</i> sp. BNC1                                             | ZP_00193174.2      |
| Bacteria                            | <i>Rhodospseudomonas palustris</i> CGA009                                 | NP_948048.1        |
| Bacteria                            | <i>Brucella melitensis</i> 16M <i>Brucella suis</i> 1330 imported         | NP_698439.1        |
| Bacteria                            | <i>Listeria innocua</i> Clip11262 imported                                | NP_470799.1        |
| Bacteria                            | <i>Listeria monocytogenes</i> EGD-e; 1/2a F6854; 4b F2365; 4b H7858       | NP_464949.1        |
| Bacteria                            | <i>Nostoc</i> sp. PCC 7120 imported                                       | NP_478248.1        |
| Bacteria                            | <i>Nostoc punctiforme</i> PCC 73102                                       | ZP_00109210.1      |
| Viridiplantae                       | <i>Chlamydomonas reinhardtii</i>                                          | AAM54030.1         |
| Bacteria                            | <i>Pseudomonas aeruginosa</i> PAO1 imported                               | NP_253024.1        |
| Bacteria                            | <i>Pseudomonas aeruginosa</i>                                             | AAD46618.1         |
| Bacteria                            | <i>Pseudomonas aeruginosa</i>                                             | Q9RPF3             |
| Bacteria                            | <i>Pseudomonas aeruginosa</i> UCBPP-PA14                                  | ZP_00137817.2      |
| Bacteria                            | <i>Pseudomonas syringae</i> pv. <i>syringae</i> B728a                     | ZP_00123959.1      |
| Bacteria                            | <i>Pseudomonas syringae</i> pv. <i>tomato</i> str. DC3000                 | AAO56006.1         |
| Bacteria                            | <i>Pseudomonas fluorescens</i> PfO-1                                      | ZP_00266731.1      |
| Bacteria                            | <i>Ralstonia solanacearum</i> GMI1000                                     | NP_522081.1        |
| Bacteria                            | <i>Burkholderia fungorum</i> LB400                                        | ZP_00279979.1      |
| Bacteria                            | <i>Chromobacterium violaceum</i> ATCC 12472                               | AAQ58252.1         |
| Bacteria                            | <i>Burkholderia cepacia</i> R18194                                        | ZP_00212888.1      |
| Bacteria                            | <i>Burkholderia cepacia</i> R1808                                         | ZP_00223794.1      |
| Bacteria                            | <i>Burkholderia mallei</i> ATCC 23344                                     | YP_102600.1        |
| Bacteria                            | <i>Burkholderia fungorum</i> LB400                                        | ZP_00284431.1      |
| Bacteria                            | <i>Burkholderia pseudomallei</i> K96243                                   | YP_108174.1        |

|          |                                                                     |               |
|----------|---------------------------------------------------------------------|---------------|
| Bacteria | <i>Mesorhizobium loti</i> MAFF303099                                | NP_103831.1   |
| Bacteria | <i>Bradyrhizobium japonicum</i> USDA 110                            | AAO38774.1    |
| Bacteria | <i>Xylella fastidiosa</i> 9a5c imported                             | NP_298305.1   |
| Bacteria | <i>Xylella fastidiosa</i> Temecula1                                 | NP_778543.1   |
| Bacteria | <i>Xylella fastidiosa</i> Ann-1                                     | ZP_00042143.2 |
| Bacteria | <i>Xylella fastidiosa</i> Dixon                                     | ZP_00039039.2 |
| Bacteria | <i>Xanthomonas campestris</i> pv. <i>campestris</i> str. ATCC 33913 | NP_637527.1   |
| Bacteria | <i>Xanthomonas axonopodis</i> pv. <i>citri</i> str. 306             | NP_642362.1   |
| Bacteria | <i>Magnetospirillum magnetotacticum</i> MS-1                        | ZP_00052649.2 |
| Bacteria | <i>Pseudomonas aeruginosa</i> PAO1 imported                         | NP_249500.1   |
| Bacteria | <i>Pseudomonas aeruginosa</i> UCBPP-PA14                            | AAD46619.1    |
| Bacteria | <i>Ralstonia eutropha</i> JMP134                                    | ZP_00169298.2 |
| Bacteria | <i>Rubrivivax gelatinosus</i> PM1                                   | ZP_00242937.1 |

Bacteria Group A\*

|               |                                                                                                                  |               |
|---------------|------------------------------------------------------------------------------------------------------------------|---------------|
| Bacteria      | <i>Mycobacterium leprae</i> TN imported                                                                          | NP_302396.1   |
| Bacteria      | <i>Mycobacterium leprae</i>                                                                                      | AAA63075.1    |
| Bacteria      | <i>Mycobacterium tuberculosis</i> CDC1551                                                                        | NP_335384.1   |
| Bacteria      | <i>Mycobacterium tuberculosis</i> H37Rv                                                                          | YP_177767.1   |
| Bacteria      | <i>Mycobacterium bovis</i>                                                                                       | CAA06684.1    |
| Bacteria      | <i>Mycobacterium avium</i> subsp. <i>paratuberculosis</i> str. k10                                               | NP_959803.1   |
| Viridiplantae | <i>Gordonia westfalica</i>                                                                                       | CAE09090.1    |
| Bacteria      | <i>Bifidobacterium longum</i> NCC2705                                                                            | AAN24094.1    |
| Bacteria      | <i>Bifidobacterium longum</i> DJO10A                                                                             | ZP_00121111.2 |
| Bacteria      | <i>Arthrobacter aurescens</i>                                                                                    | AAS20095.1    |
| Bacteria      | <i>Leifsonia xyli</i> subsp. <i>xyli</i> str. CTCB07                                                             | YP_062898.1   |
| Bacteria      | <i>Corynebacterium glutamicum</i>                                                                                | BAD83989.1    |
| Bacteria      | <i>Propionibacterium acnes</i> KPA171202                                                                         | YP_056698.1   |
| Bacteria      | <i>Corynebacterium diphtheriae</i>                                                                               | NP_863182.1   |
| Bacteria      | <i>Clostridium acetobutylicum</i> ATCC 824                                                                       | NP_149227.1   |
| Bacteria      | <i>Thermoanaerobacter tengcongensis</i> MB4                                                                      | NP_623863.1   |
| Bacteria      | <i>Burkholderia cepacia</i> R18194                                                                               | ZP_00215167.1 |
| Bacteria      | <i>Burkholderia cepacia</i> R1808                                                                                | ZP_00223704.1 |
| Bacteria      | <i>Burkholderia mallei</i> ATCC 23344                                                                            | YP_105888.1   |
| Bacteria      | <i>Burkholderia pseudomallei</i> K96243                                                                          | YP_110974.1   |
| Bacteria      | <i>Burkholderia cepacia</i> R18194                                                                               | ZP_00216505.1 |
| Bacteria      | <i>Escherichia coli</i> O157:H7 <i>Escherichia coli</i> O157:H7 EDL933 imported                                  | AAG57518.1    |
| Bacteria      | <i>Escherichia coli</i> CFT073 <i>Escherichia coli</i> K12 <i>Escherichia coli</i> O157:H7                       | NP_416893.1   |
| Bacteria      | <i>Shigella flexneri</i> 2a str. 301                                                                             | NP_708258.1   |
| Bacteria      | <i>Shigella flexneri</i> 2a str. 2457T                                                                           | NP_837967.1   |
| Bacteria      | <i>Salmonella typhimurium</i> LT2                                                                                | NP_461349.1   |
| Bacteria      | <i>Salmonella enterica</i> subsp. <i>enterica</i> serovar Paratyphi A str. ATCC 9150; Typhi Ty2; Typhi str. CT18 | YP_149769.1   |
| Bacteria      | <i>Erwinia carotovora</i> subsp. <i>atroseptica</i> SCRI1043                                                     | YP_048953.1   |
| Bacteria      | <i>Yersinia pestis</i> CO92; KIM, <i>Yersinia pseudotuberculosis</i> IP 32953                                    | NP_668820.1   |
| Bacteria      | <i>Yersinia pestis</i> biovar <i>Medievalis</i> str. 91001                                                       | NP_993923.1   |
| Fungi         | <i>Candidatus Blochmannia floridanus</i>                                                                         | NP_878784.1   |
| Bacteria      | <i>Deinococcus radiodurans</i> R1                                                                                | NP_295432.1   |
| Bacteria      | <i>Bacillus subtilis</i> subsp. <i>subtilis</i> str. 168                                                         | NP_388317.1   |
| Bacteria      | <i>Bacillus licheniformis</i> ATCC 14580; DSM 13                                                                 | YP_077764.1   |
| Bacteria      | <i>Bacillus cereus</i> ATCC 14579                                                                                | NP_831576.1   |
| Bacteria      | <i>Bacillus cereus</i> ATCC 10987                                                                                | NP_978276.1   |
| Bacteria      | <i>Bacillus cereus</i> G9241                                                                                     | ZP_00236637.1 |
| Bacteria      | <i>Bacillus anthracis</i> str. 'Ames Ancestor'; A2012; Ames; Sterne                                              | YP_018522.1   |
| Bacteria      | <i>Bacillus thuringiensis</i> serovar konkukian str. 97-27                                                       | YP_036050.1   |
| Bacteria      | <i>Bacillus cereus</i> ZK                                                                                        | YP_083288.1   |
| Bacteria      | <i>Rubrobacter xylanophilus</i> DSM 9941                                                                         | ZP_00186579.2 |
| Bacteria      | <i>Exiguobacterium</i> sp. 255-15                                                                                | ZP_00182706.2 |

Halophilic bacteria SSP2176 orthologs\*

|          |                                          |             |
|----------|------------------------------------------|-------------|
| Archaea  | <i>Natronomonas pharaonis</i> imported   | CAA71528.1  |
| Archaea  | <i>Haloarcula marismortui</i> ATCC 43049 | YP_134575.1 |
| Bacteria | <i>Idiomarina loihiensis</i> L2TR        | YP_156677.1 |
| Bacteria | <i>Rhodospirellula baltica</i> SH 1      | NP_868359.1 |

|          |                                               |                    |
|----------|-----------------------------------------------|--------------------|
| Bacteria | <i>Oceanobacillus iheyensis</i> HTE831        | NP_691658.1        |
| Bacteria | <i>Bacillus clausii</i> KSM-K16               | YP_174679.1        |
| Bacteria | <i>Staphylococcus saprophyticus</i> ATCC15305 | SSP2176; this work |

Bacteria SSP1158 orthologs\*

|          |                                                                |               |
|----------|----------------------------------------------------------------|---------------|
| Archaea  | <i>Thermoplasma volcanium</i> GSS1                             | NP_111347.1   |
| Archaea  | <i>Thermoplasma acidophilum</i> DSM 1728                       | NP_393956.1   |
| Archaea  | <i>Sulfolobus solfataricus</i> P2 imported                     | NP_344311.1   |
| Archaea  | <i>Ferroplasma acidarmanus</i>                                 | ZP_00307131.1 |
| Bacteria | <i>Chromobacterium violaceum</i> ATCC 12472                    | AAQ60978.1    |
| Bacteria | <i>Mycobacterium avium subsp. paratuberculosis</i> str. k10    | NP_962999.1   |
| Bacteria | <i>Oenococcus oeni</i> PSU-1                                   | ZP_00319131.1 |
| Bacteria | <i>Pediococcus pentosaceus</i> ATCC 25745                      | ZP_00322957.1 |
| Bacteria | <i>Mycobacterium leprae</i> TN imported                        | NP_302701.1   |
| Bacteria | <i>Mycobacterium leprae</i>                                    | CAA22902.1    |
| Bacteria | <i>Mycobacterium avium subsp. paratuberculosis</i> str. k10    | NP_962451.1   |
| Bacteria | <i>Mycobacterium avium subsp. paratuberculosis</i> str. k10    | NP_961000.1   |
| Bacteria | <i>Ralstonia solanacearum</i> GMI1000                          | NP_521588.1   |
| Bacteria | <i>Rhodopseudomonas palustris</i> CGA009                       | NP_948630.1   |
| Bacteria | <i>Burkholderia cepacia</i> genomovar III                      | AAL59393.1    |
| Bacteria | <i>Burkholderia cepacia</i> R18194                             | ZP_00214764.1 |
| Bacteria | <i>Burkholderia cepacia</i> R1808                              | ZP_00219884.1 |
| Bacteria | <i>Burkholderia pseudomallei</i> K96243                        | YP_106922.1   |
| Bacteria | <i>Burkholderia mallei</i> ATCC 23344                          | YP_104821.1   |
| Bacteria | <i>Chromobacterium violaceum</i> ATCC 12472                    | AAQ61139.1    |
| Bacteria | <i>Clostridium acetobutylicum</i> ATCC 824 imported            | NP_347322.1   |
| Bacteria | <i>Clostridium acetobutylicum</i> ATCC 824 imported            | NP_349921.1   |
| Bacteria | <i>Sinorhizobium meliloti</i> 1021 imported                    | NP_435850.1   |
| Bacteria | <i>Bradyrhizobium japonicum</i> USDA 110                       | NP_772757.1   |
| Bacteria | <i>Bradyrhizobium japonicum</i> USDA 110                       | NP_774678.1   |
| Bacteria | <i>Rhodopseudomonas palustris</i> CGA009                       | NP_946164.1   |
| Bacteria | <i>Burkholderia cepacia</i> R1808                              | ZP_00223622.1 |
| Bacteria | <i>Burkholderia fungorum</i> LB400                             | ZP_00278848.1 |
| Bacteria | <i>Burkholderia fungorum</i> LB400                             | ZP_00278433.1 |
| Bacteria | <i>Novosphingobium aromaticivorans</i> DSM 12444               | ZP_00305072.1 |
| Bacteria | <i>Burkholderia cepacia</i> R1808                              | ZP_00222843.1 |
| Bacteria | <i>Ralstonia eutropha</i> JMP134                               | ZP_00166062.1 |
| Bacteria | <i>Burkholderia cepacia</i> R1808                              | ZP_00224658.1 |
| Bacteria | <i>Burkholderia pseudomallei</i> K96243                        | YP_112237.1   |
| Bacteria | <i>Pseudomonas syringae</i> pv. <i>tomato</i> str. DC3000      | AAO55971.1    |
| Bacteria | <i>Pseudomonas syringae</i> pv. <i>syringae</i> B728a          | ZP_00124033.2 |
| Bacteria | <i>Desulfotalea psychrophila</i> LSv54                         | YP_065996.1   |
| Archaea  | <i>Haloarcula marismortui</i> ATCC 43049                       | YP_134927.1   |
| Bacteria | <i>Pseudomonas aeruginosa</i> PAO1 imported                    | NP_252455.1   |
| Bacteria | <i>Pseudomonas aeruginosa</i> UCBPP-PA14                       | ZP_00137164.2 |
| Bacteria | <i>Staphylococcus aureus subsp. aureus</i> Mu50; N315 imported | NP_370830.1   |
| Bacteria | <i>Clostridium perfringens</i> str. 13                         | NP_561320.1   |
| Bacteria | <i>Bacillus cereus</i> ATCC 14579                              | NP_831815.1   |
| Bacteria | <i>Bacillus cereus</i> G9241                                   | ZP_00237549.1 |
| Bacteria | <i>Bacillus anthracis</i> str. Ames                            | YP_018704.2   |
| Bacteria | <i>Bacillus anthracis</i> str. Sterne                          | YP_028179.1   |
| Bacteria | <i>Bacillus thuringiensis serovar konkukian</i> str. 97-27     | YP_036209.1   |
| Bacteria | <i>Bacillus cereus</i> ZK                                      | YP_083462.1   |
| Bacteria | <i>Bacillus halodurans</i> C-125 imported                      | NP_242686.1   |
| Bacteria | <i>Oceanobacillus iheyensis</i> HTE831                         | NP_693600.1   |
| Bacteria | <i>Bacillus subtilis</i>                                       | BAA09037.1    |
| Bacteria | <i>Bacillus subtilis</i>                                       | BAA07359.1    |
| Bacteria | <i>Bacillus subtilis subsp. subtilis</i> str. 168              | NP_388288.2   |
| Bacteria | <i>Bacillus subtilis</i>                                       | gil7474466    |
| Bacteria | <i>Bacillus licheniformis</i> ATCC 14580; DSM 13               | YP_077735.1   |
| Bacteria | <i>Neisseria meningitidis</i> MC58 imported                    | NP_273284.1   |
| Bacteria | <i>Neisseria meningitidis</i> Z2491 imported                   | NP_282886.1   |
| Bacteria | <i>Haemophilus somnus</i> 2336                                 | ZP_00132868.2 |

|          |                                                                           |                    |
|----------|---------------------------------------------------------------------------|--------------------|
| Bacteria | <i>Haemophilus somnus</i> 129PT                                           | ZP_00123072.2      |
| Bacteria | <i>Haemophilus influenzae</i> Rd KW20                                     | NP_439869.1        |
| Bacteria | <i>Haemophilus influenzae</i> R2866                                       | ZP_00157490.2      |
| Bacteria | <i>Haemophilus influenzae</i> 86-028NP                                    | ZP_00321594.1      |
| Bacteria | <i>Psychrobacter</i> sp. 273-4                                            | ZP_00146259.1      |
| Bacteria | <i>Fusobacterium nucleatum</i> subsp. <i>nucleatum</i> ATCC 25586         | NP_603338.1        |
| Bacteria | <i>Fusobacterium nucleatum</i> subsp. <i>vincentii</i> ATCC 49256         | ZP_00144906.1      |
| Bacteria | <i>Staphylococcus aureus</i> subsp. <i>aureus</i> Mu50                    | NP_372128.1        |
| Bacteria | <i>Staphylococcus aureus</i> subsp. <i>aureus</i> COL; MSSA476; MW2; N315 | AAW38275.1         |
| Bacteria | <i>Staphylococcus aureus</i> subsp. <i>aureus</i> MRSA252                 | YP_041073.1        |
| Bacteria | <i>Staphylococcus epidermidis</i> ATCC 12228                              | NP_764841.1        |
| Bacteria | <i>Staphylococcus saprophyticus</i> ATCC15305                             | SSP1158; this work |
| Bacteria | <i>Bacillus clausii</i> KSM-K16                                           | YP_177264.1        |
| Bacteria | <i>Leuconostoc mesenteroides</i> subsp. <i>mesenteroides</i> ATCC 8293    | ZP_00062549.1      |
| Bacteria | <i>Agrobacterium tumefaciens</i> str. C58 imported                        | NP_356725.1        |
| Bacteria | <i>Agrobacterium tumefaciens</i> str. C58 imported                        | NP_534401.1        |
| Bacteria | <i>Pseudomonas syringae</i> pv. <i>tomato</i> str. DC3000                 | AAO58799.1         |
| Bacteria | <i>Pseudomonas syringae</i> pv. <i>syringae</i> B728a                     | ZP_00125161.2      |
| Bacteria | <i>Acinetobacter</i> sp. ADP1                                             | YP_047110.1        |
| Bacteria | <i>Corynebacterium glutamicum</i> ATCC 13032                              | NP_600230.1        |
| Bacteria | <i>Corynebacterium glutamicum</i> ATCC 13032                              | BAB98398.1         |
| Bacteria | <i>Corynebacterium efficiens</i> YS-314                                   | NP_737677.1        |
| Bacteria | <i>Kineococcus radiotolerans</i> SRS30216                                 | ZP_00353340.1      |
| Bacteria | <i>Vibrio vulnificus</i> CMCP6                                            | AAO07491.1         |
| Bacteria | <i>Vibrio vulnificus</i> YJ016                                            | NP_937146.1        |
| Bacteria | <i>Vibrio parahaemolyticus</i> RIMD 2210633                               | NP_800678.1        |

Others\*

|               |                                                     |             |
|---------------|-----------------------------------------------------|-------------|
| Alveolata     | <i>Plasmodium yoelii yoelii</i>                     | EAA16619.1  |
| Alveolata     | <i>Plasmodium berghei</i>                           | CAH97844.1  |
| Alveolata     | <i>Plasmodium falciparum</i> 3D7                    | NP_703581.1 |
| Viridiplantae | <i>Oryza sativa</i> (japonica cultivar-group)       | AAQ95276.1  |
| Viridiplantae | <i>Petunia x hybrida</i>                            | AAR08678.1  |
| Viridiplantae | <i>Arabidopsis thaliana</i>                         | BAB08388.1  |
| Bacteria      | <i>Clostridium acetobutylicum</i> ATCC 824 imported | NP_347265.1 |
| Bacteria      | <i>Thermoanaerobacter tengcongensis</i> MB4         | NP_622344.1 |
| Bacteria      | <i>Bacteroides thetaiotaomicron</i> VPI-5482        | NP_809542.1 |
| Bacteria      | <i>Bacteroides fragilis</i> YCH46                   | YP_099844.1 |
| Bacteria      | <i>Chlorobium tepidum</i> TLS                       | NP_661903.1 |

\* Phylogenetic cluster shown in Fig. 5.
